# Supplementary material for: Imaging the recruitment and loss of proteins and lipids at single sites of calcium-triggered exocytosis
Source: PubMed Central journal article supplement — Mol Biol Cell. 2016 Aug 1;27(15):2423–34. doi: 10.1091/mbc.E16-01-0057 (PMC4966983; doi:10.1091/mbc.e16-01-0057), 2016-08-01
Supplement: supp_E16-01-0057v1_CombinedSupMats.pdf [file supp_E16-01-0057v1_CombinedSupMats.pdf]

# Supplemental Materials

*Molecular Biology of the Cell*

Trexler et al.

# SI Figure 1

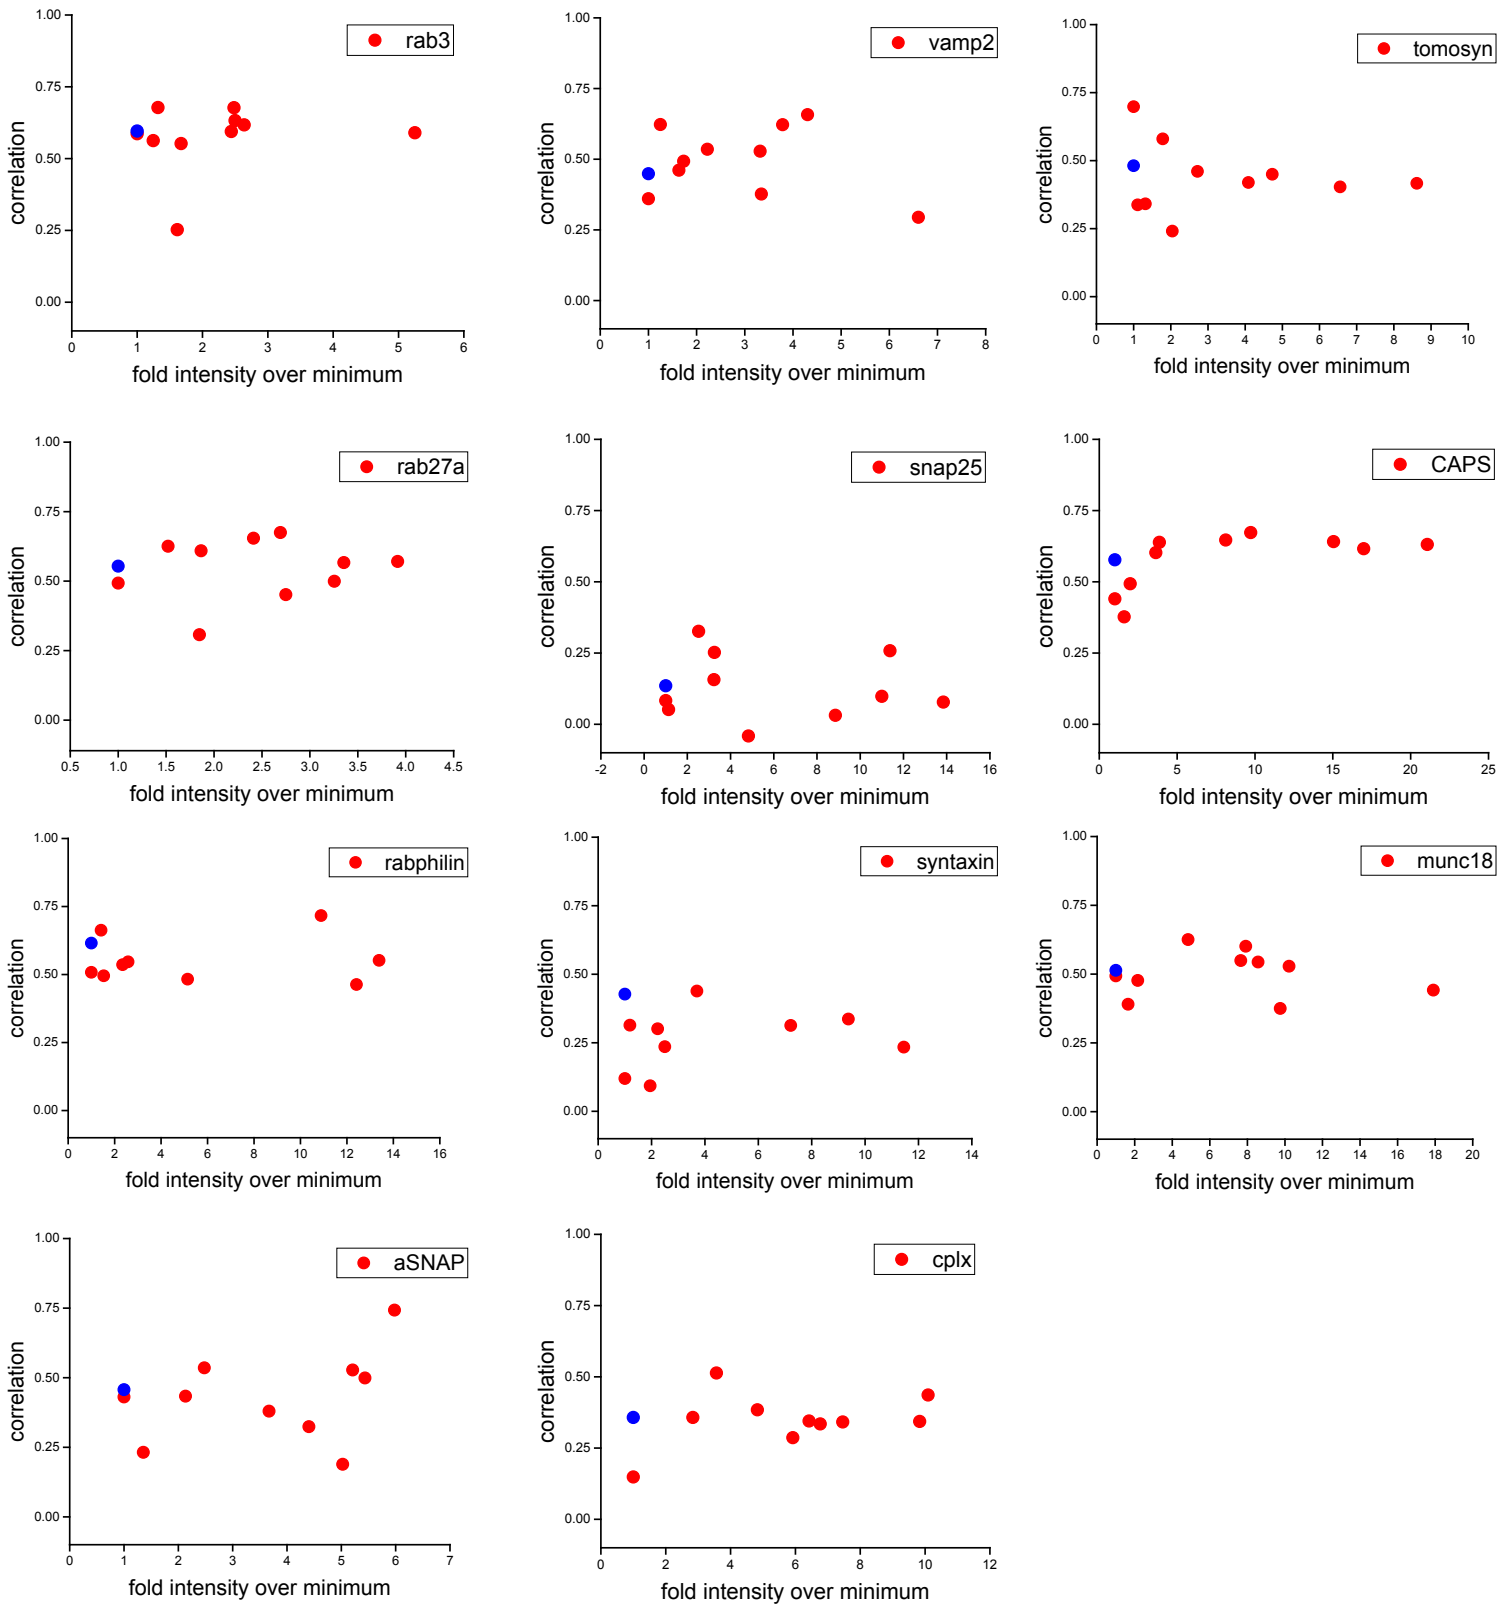

SI Figure 1: Protein overexpression level does not affect correlation values. Cells expressing the indicated constructs were imaged on one coverslip under carefully controlled conditions with the same illumination intensity and TIRF illumination profile. Under this setup, we use average pixel fluorescence intensity from cells (background subtracted from an adjacent region in the field of view) as a proxy for expression level. We normalized intensity to the minimum intensity from the dataset (set to 1) and plotted this against the mean correlation value obtained from that cell according to the correlation analysis described in the text. The blue datapoint is the average correlation value from the entire dataset for that construct (given in Figure 2) for comparison plotted at  $x=1$ .

# SI Figure 2

Amphiphysin

4X mag

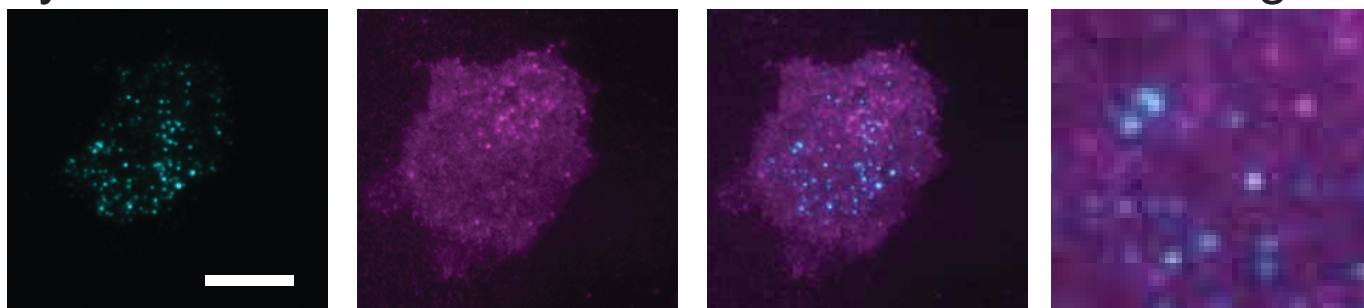

alpha-SNAP

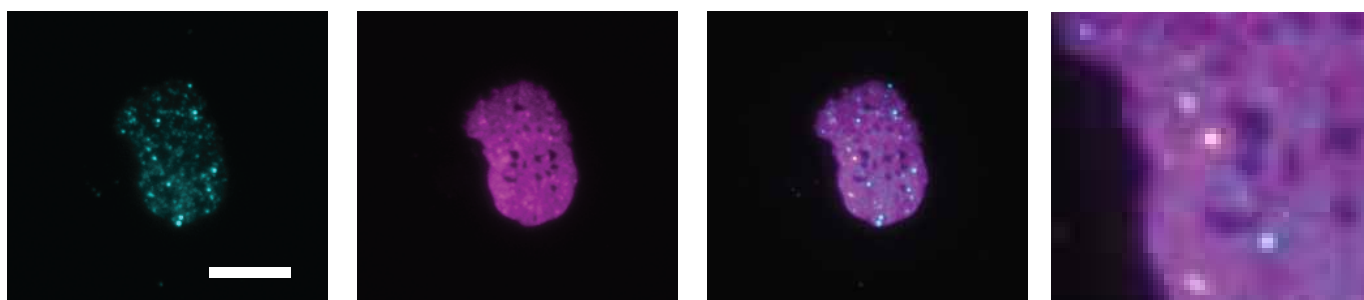

beta-actin

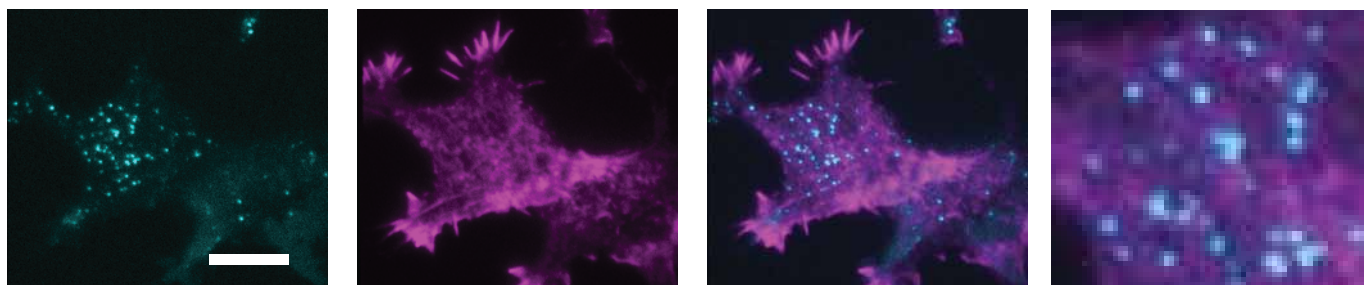

CAPS

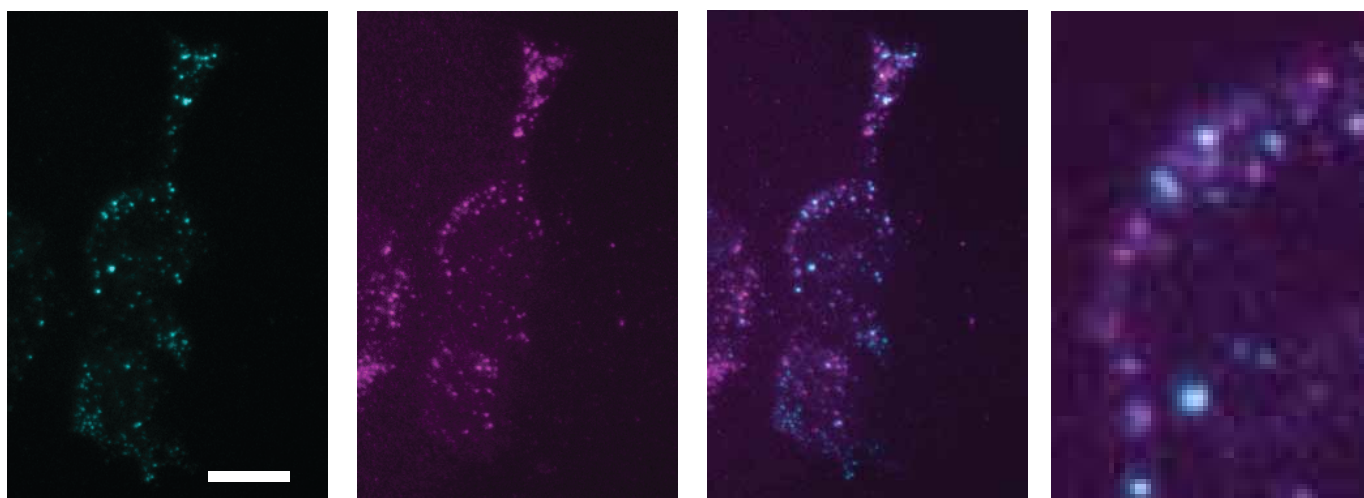

clathrin

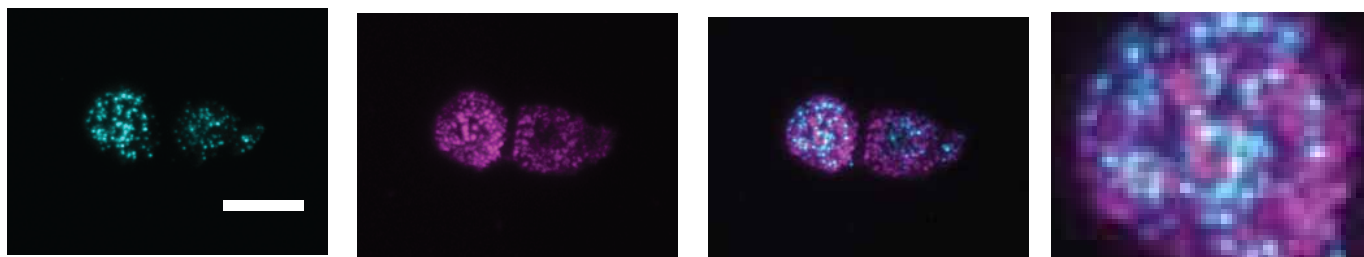

# SI Figure 2

complexin

4X mag

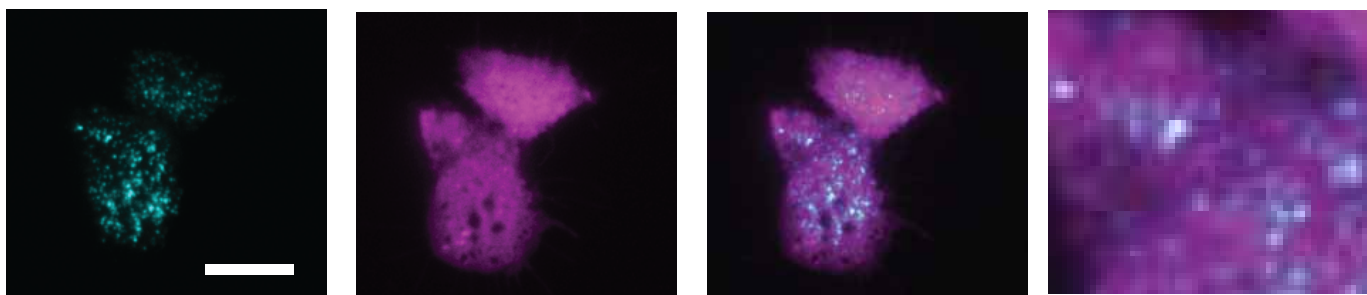

dynammin-1

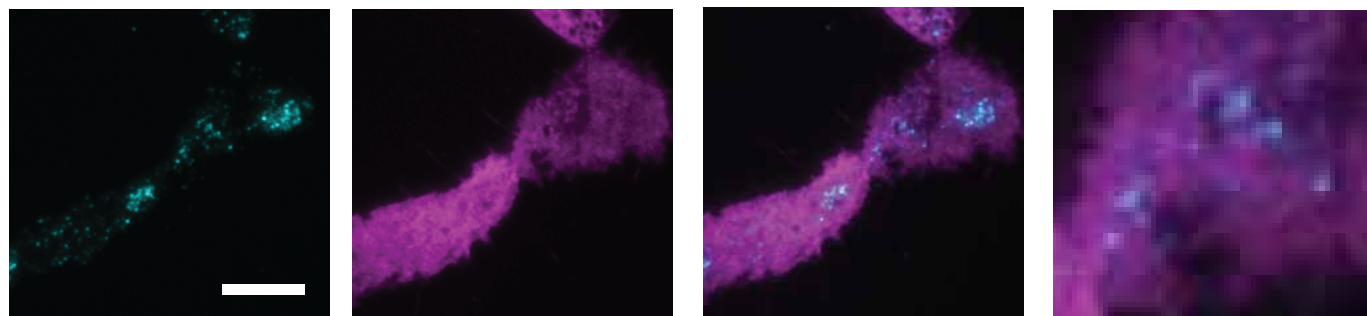

endophilin-A2

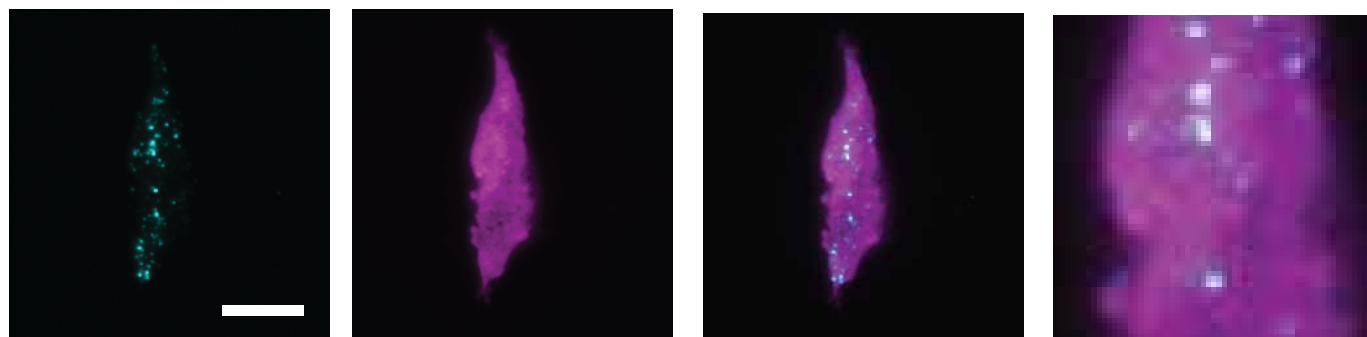

endophilin-B1

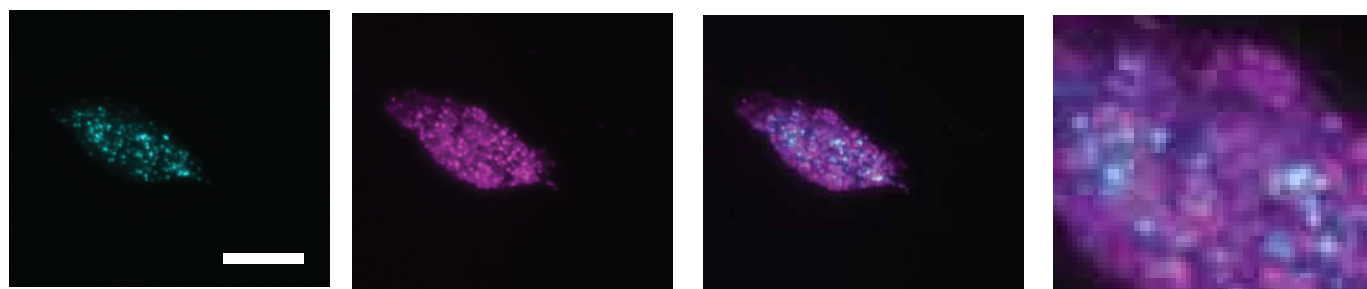

farn-mCherry

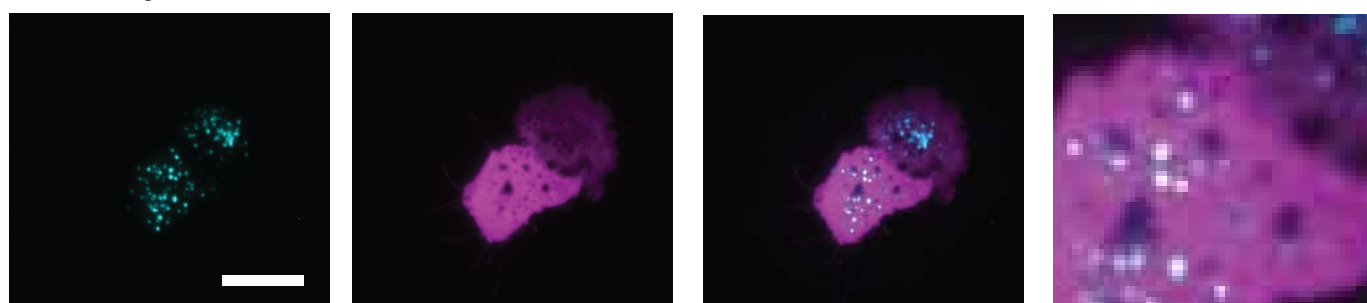

# SI Figure 2

munc18a

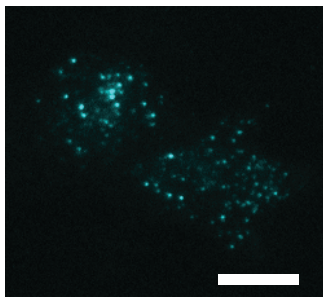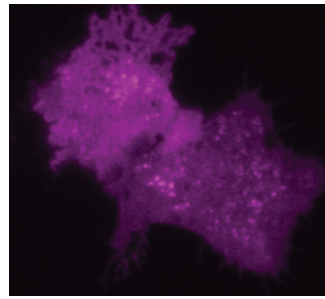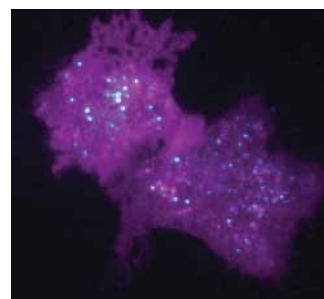

4X mag

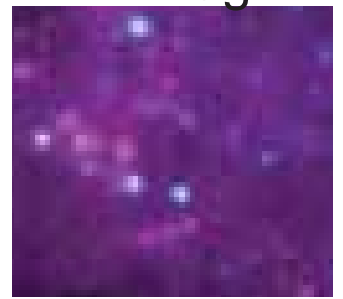

mCherry

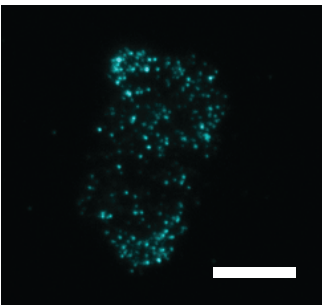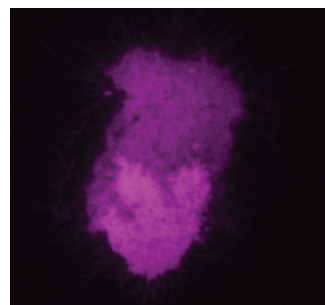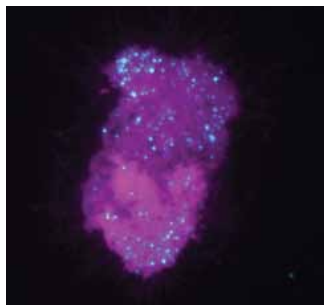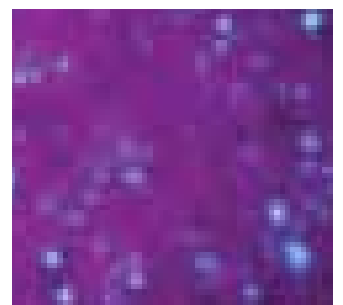

phogrin

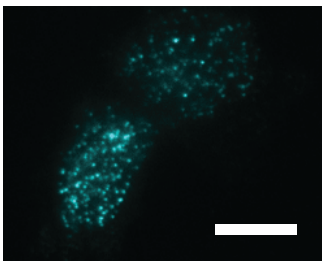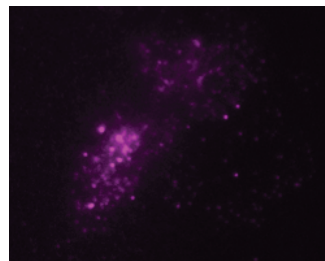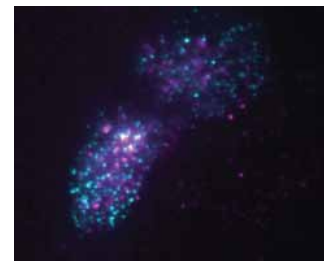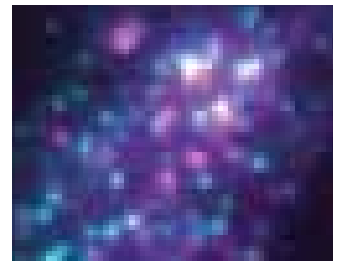

PH-PLCd1

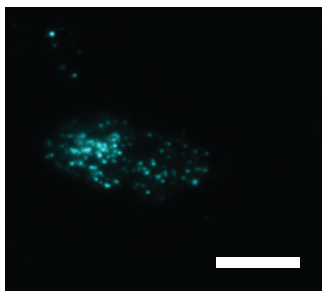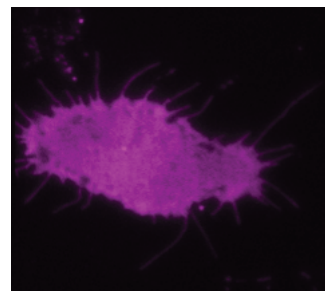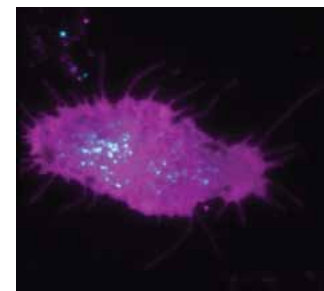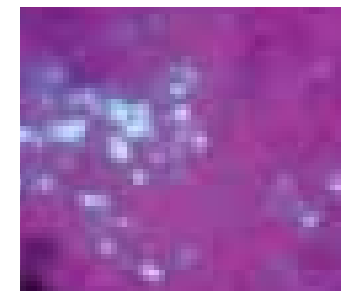

PH-PLCd4

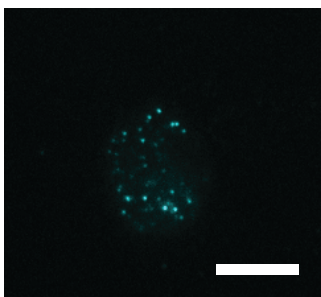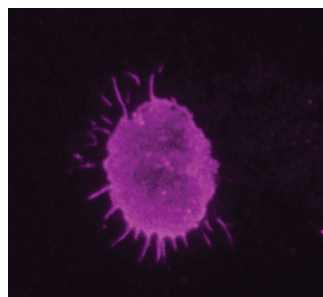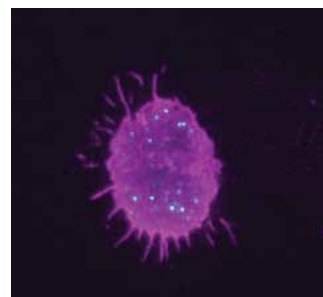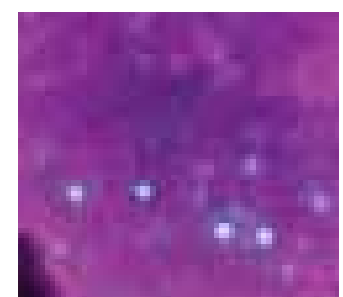



# SI Figure 2

Rab3a

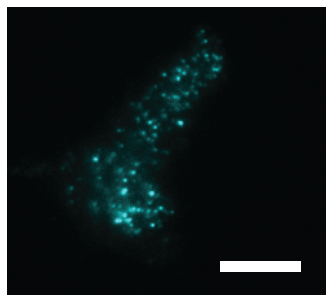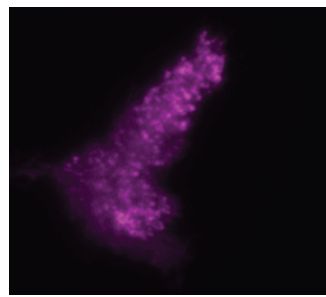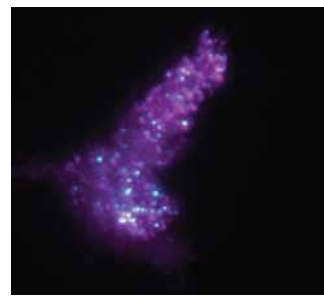

4X mag

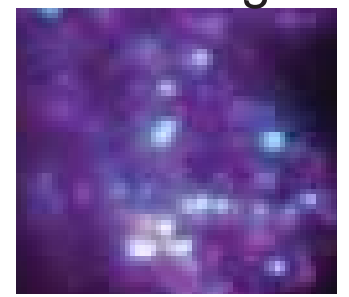

Rabphilin3a

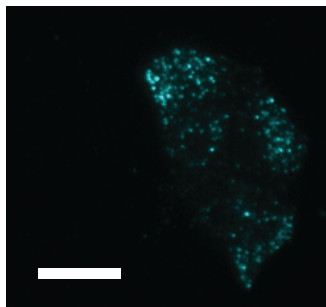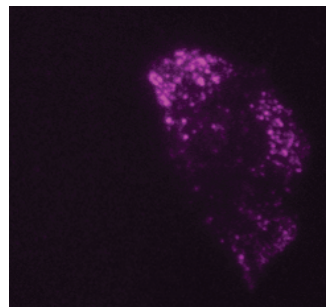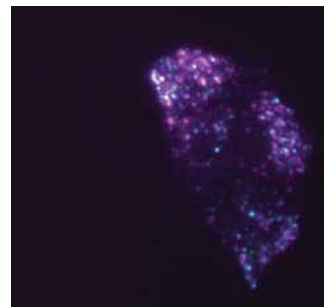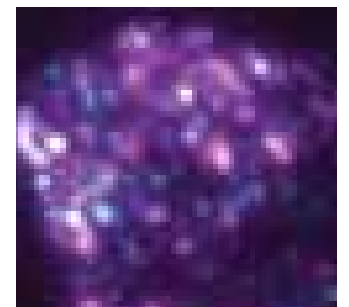

Rab5a

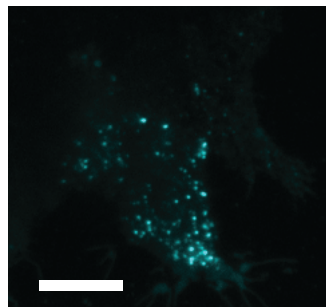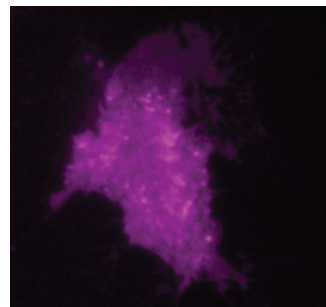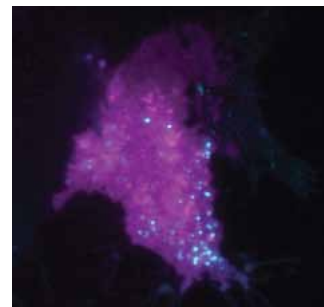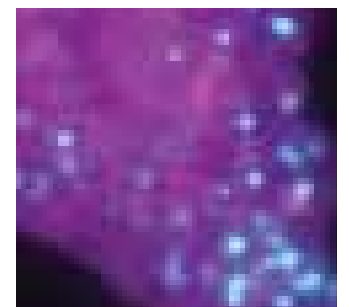

Rab27a

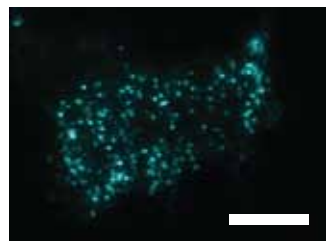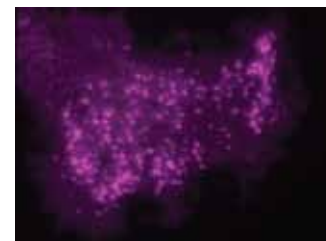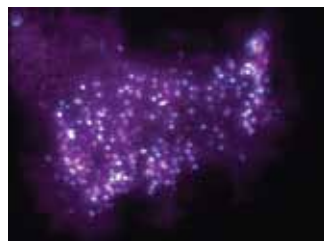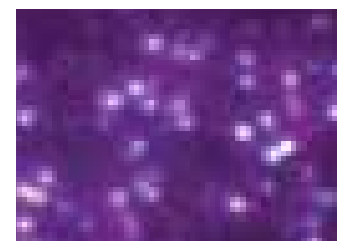

SNAP25

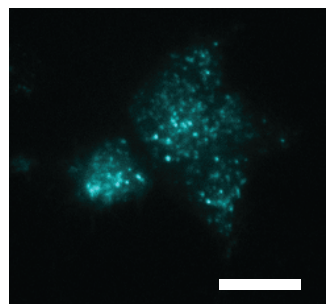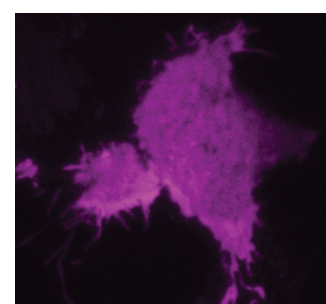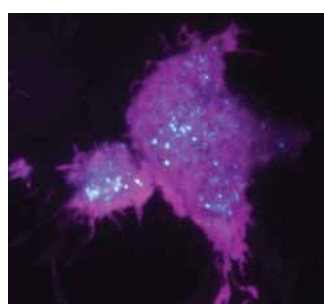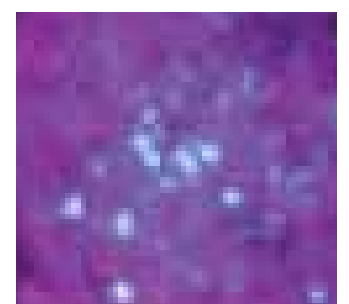

# SI Figure 2

Synaptojanin

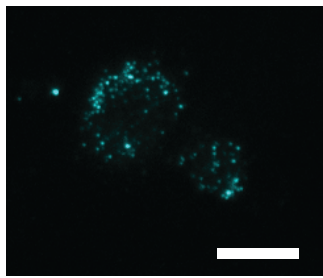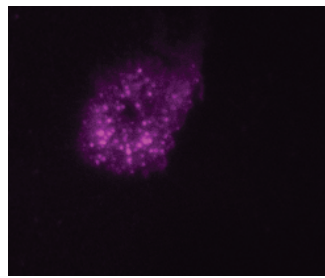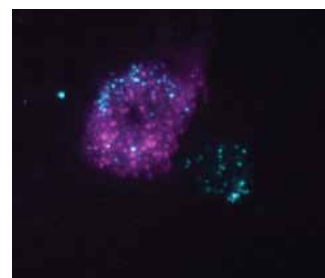

4X mag

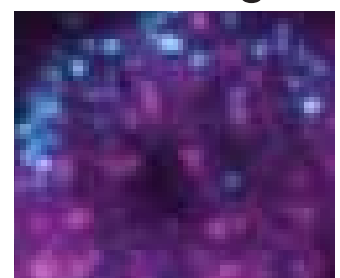

Synaptotagmin1

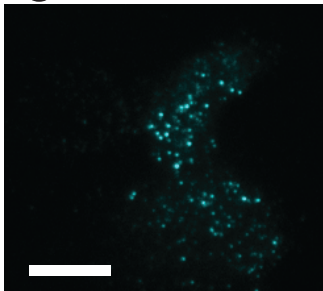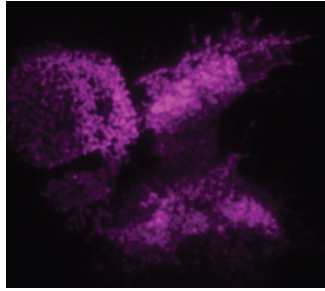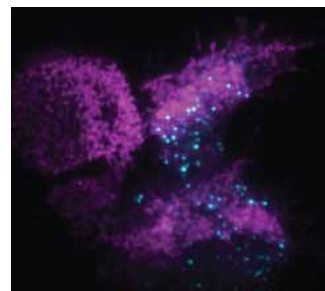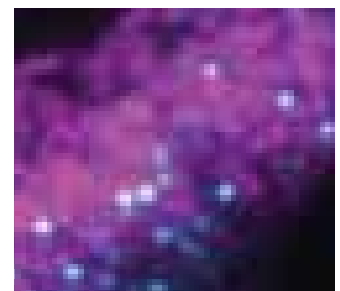

Syndapin2

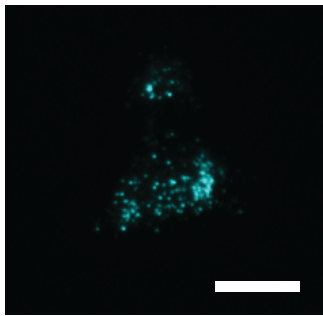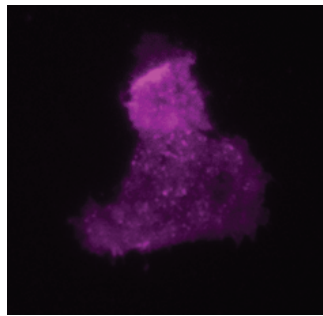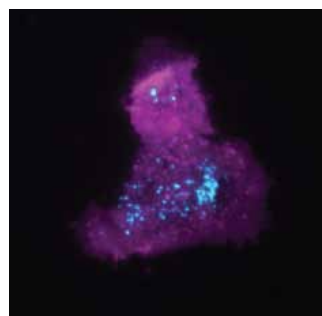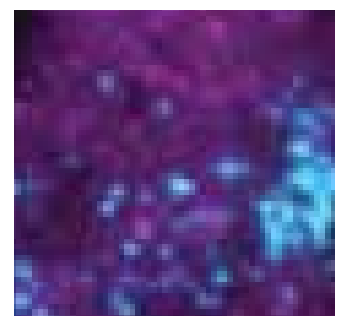

Syntaxin1a

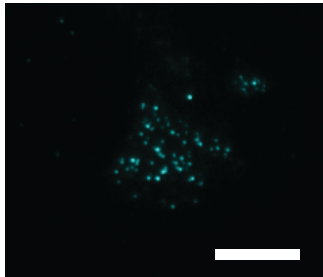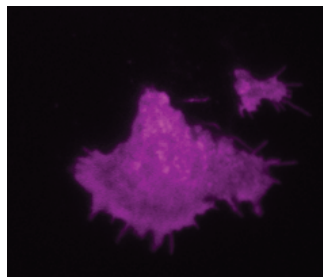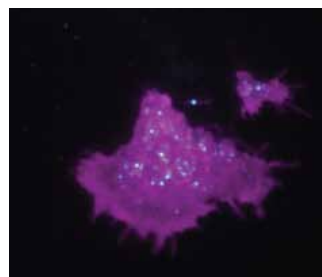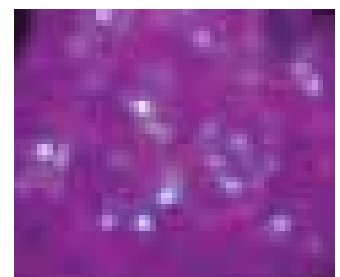

Tomosyn

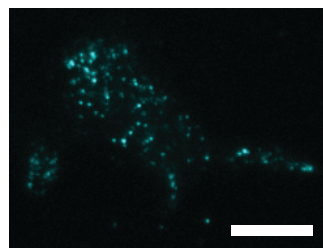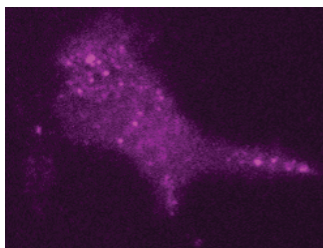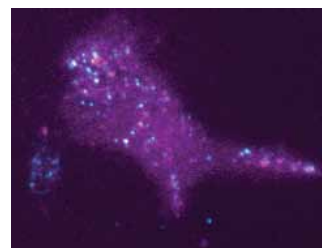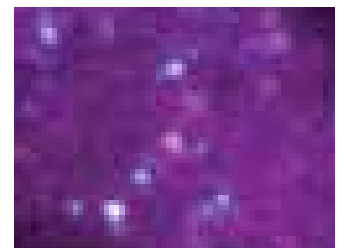

# SI Figure 2

## VAMP2

4X mag

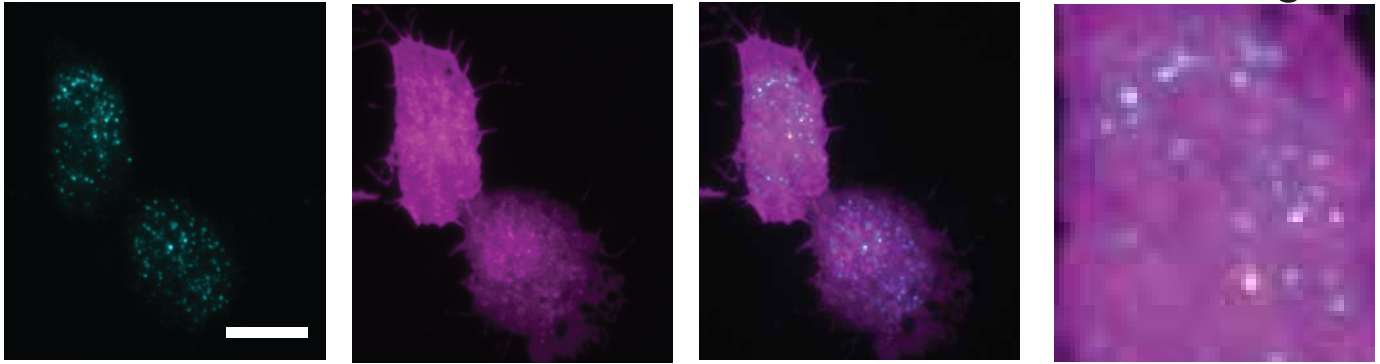

## VAMP3

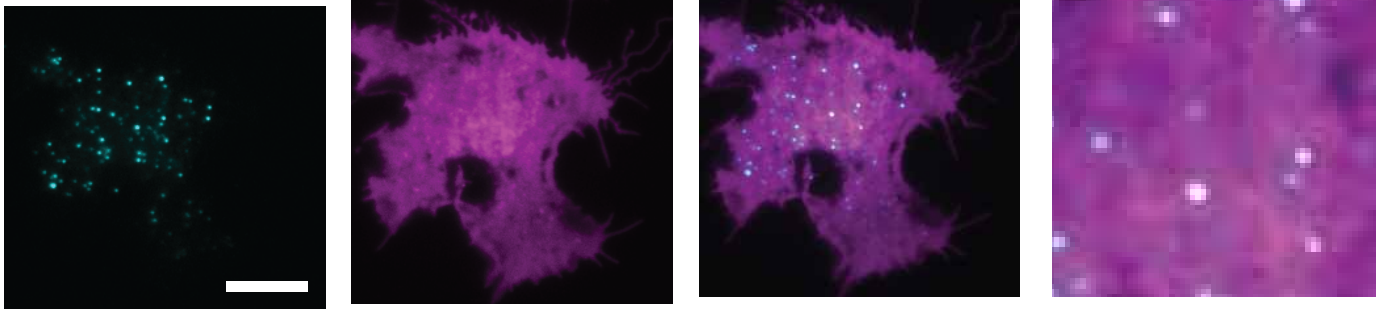

SI Figure 2: Gallery of representative TIRF images from all cells imaged. From left to right in each row: cyan image of NPY-GFP, magenta image of the red-labeled test protein, merge of both channels, and a 4X magnification of the merged image to better show colocalization patterns. Scale bars are 10  $\mu\text{m}$ .



# SI Figure 3

A

|               | rabphilin3a | rab3      | CAPS      | rab27a    | munc18    | tomosyn   | alphaSNAP | VAMP2     | syntaxin1a | rab5a      | complexin | endophilinB1 | VAMP3     | phogrin   | OCRL      | synaptotagmin | endophilinA2 | syndapin  | clathrin  | SNAP25    | synaptotagmin | dynamnin-1 | Fcho2     | Ph-PLCδ4  | mCherry alone | amphiphysin | farn-mCherry | PH-PLC  | dynamnin-2 | actin   |
|---------------|-------------|-----------|-----------|-----------|-----------|-----------|-----------|-----------|------------|------------|-----------|--------------|-----------|-----------|-----------|---------------|--------------|-----------|-----------|-----------|---------------|------------|-----------|-----------|---------------|-------------|--------------|---------|------------|---------|
| rabphilin3a   | 1           | 0.019312  | 3.159E-05 | 5.746E-10 | 1.681E-28 | 2.25E-38  | 3.197E-40 | 3.166E-58 | 3.459E-52  | 6.76E-108  | 6.125E-79 | 2.94E-121    | 1.75E-113 | 2.45E-141 | 6.56E-104 | 2.56E-143     | 3.27E-149    | 2.64E-145 | 2.43E-235 | 3.26E-130 | 1.17E-165     | 2.14E-159  | 1.06E-231 | 3.68E-201 | 2.31E-248     | 6.15E-148   | 1E-261       | 6E-212  | 0          |         |
| rab3          | 0.019312    | 1         | 0.0234814 | 2.663E-06 | 2.775E-23 | 9.53E-36  | 3.983E-39 | 1.458E-56 | 1.539E-52  | 2.78E-114  | 5.63E-123 | 1.104E-82    | 3.2E-128  | 1.96E-121 | 1.42E-152 | 2.75E-112     | 2.79E-160    | 6.01E-170 | 2.15E-161 | 9.24E-266 | 7.68E-144     | 2.99E-188  | 4.54E-178 | 8.61E-264 | 1.25E-230     | 9.06E-284   | 1.19E-168    | 4E-299  | 6E-243     | 0       |
| CAPS          | 3.159E-05   | 0.0234814 | 1         | 0.0117705 | 1.338E-13 | 2.684E-27 | 7.076E-31 | 3.35E-42  | 5.944E-42  | 6.846E-98  | 3.46E-105 | 3.85E-62     | 4.82E-99  | 1.851E-97 | 1.76E-122 | 6.042E-89     | 8.93E-145    | 9.95E-160 | 2.57E-131 | 1.56E-241 | 3.2E-111      | 1.5E-165   | 3.95E-144 | 7.83E-242 | 2.63E-215     | 6.18E-269   | 1.46E-146    | 2E-275  | 3E-212     | 0       |
| rab27a        | 5.746E-10   | 2.663E-06 | 0.0117705 | 1         | 9.824E-06 | 1.532E-14 | 2.198E-18 | 3.69E-27  | 1.068E-69  | 3.795E-76  | 4.592E-46 | 2.316E-74    | 2.293E-73 | 1.264E-94 | 1.935E-68 | 8.45E-114     | 7.08E-128    | 7.1E-106  | 4.76E-198 | 1.664E-90 | 4.07E-135     | 7.5E-118   | 1.18E-199 | 5.68E-177 | 1.88E-222     | 6.47E-120   | 6E-230       | 3E-177  | 0          |         |
| munc18        | 1.681E-28   | 2.775E-23 | 1.338E-13 | 9.824E-06 | 1         | 0.0002857 | 4.906E-08 | 1.911E-12 | 2.096E-15  | 1.672E-50  | 3.56E-38  | 5.896E-63    | 3.832E-62 | 4.768E-85 | 1.423E-61 | 1.04E-103     | 1.68E-105    | 2.82E-195 | 1.845E-93 | 1.43E-135 | 2.02E-121     | 3.91E-200  | 5.73E-176 | 1.36E-220 | 5.86E-122     | 2E-235      | 4E-187       | 0       |            |         |
| tomosyn       | 2.25E-38    | 9.53E-36  | 2.684E-27 | 1.532E-14 | 0.0002857 | 1         | 0.0154142 | 0.0005953 | 6.993E-07  | 1.164E-31  | 6.184E-37 | 2.808E-21    | 2.721E-36 | 3.155E-38 | 6.182E-54 | 1.074E-38     | 9.433E-82    | 4.75E-104 | 9.089E-73 | 6.1E-161  | 1.683E-61     | 3.2E-106   | 9.892E-85 | 6.73E-169 | 5.71E-153     | 1.11E-197   | 1.893E-94    | 1E-202  | 3E-149     | 0       |
| alphaSNAP     | 3.197E-40   | 3.983E-39 | 7.076E-31 | 2.198E-18 | 4.906E-08 | 0.0154142 | 1         | 0.4456174 | 0.0194731  | 3.676E-15  | 1.157E-18 | 2.786E-12    | 4.851E-21 | 3.24E-22  | 3.308E-33 | 5.002E-24     | 9.347E-51    | 2.284E-66 | 2.596E-49 | 8.11E-108 | 4.495E-43     | 5.07E-72   | 5.457E-59 | 1.48E-114 | 1.25E-102     | 7.64E-133   | 8.594E-65    | 6E-140  | 2E-105     | 2E-246  |
| VAMP2         | 3.166E-58   | 1.458E-56 | 3.35E-42  | 1.715E-26 | 1.911E-12 | 0.0005953 | 0.4456174 | 1         | 0.0662382  | 6.409E-15  | 4.287E-19 | 1.592E-14    | 3.475E-25 | 5.429E-26 | 1.201E-40 | 1.679E-29     | 1.353E-57    | 1.889E-74 | 1.133E-63 | 4.48E-128 | 3.45E-58      | 1.354E-88  | 9.186E-78 | 2.31E-136 | 8.78E-120     | 1.41E-152   | 7.204E-81    | 1E-167  | 2E-133     | 2E-275  |
| syntaxin1a    | 3.459E-52   | 1.539E-52 | 5.944E-42 | 3.69E-27  | 2.096E-15 | 6.993E-07 | 0.0194731 | 0.0662382 | 1          | 8.314E-07  | 2.945E-09 | 1.48E-07     | 4.035E-13 | 5.596E-14 | 4.935E-23 | 7.07E-17      | 5.375E-36    | 3.387E-49 | 6.852E-40 | 1.842E-85 | 1.498E-36     | 2.162E-58  | 1.015E-49 | 1.273E-92 | 8.125E-82     | 1.13E-105   | 1.904E-53    | 4E-116  | 1.3E-90    | 1E-203  |
| rab5a         | 6.76E-108   | 2.78E-114 | 6.846E-98 | 1.068E-69 | 1.672E-50 | 1.164E-31 | 3.676E-15 | 6.409E-15 | 8.314E-07  | 1          | 0.1949156 | 0.0179575    | 0.0019579 | 2.164E-05 | 1.93E-12  | 1.679E-09     | 3.444E-25    | 4.727E-34 | 1.957E-34 | 7.552E-78 | 3.753E-34     | 5.176E-65  | 2.978E-47 | 1.927E-89 | 6.156E-79     | 2.89E-102   | 4.1E-52      | 7E-119  | 8.6E-97    | 1E-219  |
| complexin     | 2.01E-115   | 5.63E-123 | 3.48E-105 | 3.793E-76 | 1.595E-57 | 6.184E-37 | 1.157E-18 | 4.287E-19 | 2.945E-09  | 0.1949156  | 1         | 0.1352063    | 0.0072691 | 0.0014816 | 3.354E-09 | 2.654E-07     | 2.287E-20    | 5.999E-35 | 1.657E-30 | 6.9E-69   | 3.142E-31     | 2.081E-49  | 3.591E-14 | 1.756E-80 | 1.195E-70     | 1.806E-91   | 2.33E-47     | 6E-109  | 2E-90      | 2E-202  |
| endophilinB1  | 8.125E-79   | 1.104E-82 | 3.485E-62 | 4.592E-46 | 3.56E-38  | 2.808E-21 | 2.786E-12 | 1.592E-14 | 1.48E-07   | 0.0179575  | 0.1352063 | 1            | 0.5227151 | 0.2984669 | 0.0011467 | 0.0042143     | 1.308E-07    | 1.15E-13  | 1.361E-16 | 6.645E-32 | 1.12E-19      | 1.263E-24  | 8.92E-26  | 1.306E-38 | 4.712E-32     | 8.038E-41   | 1.665E-24    | 1.5E-55 | 8.5E-52    | 2.7E-96 |
| VAMP3         | 2.94E-121   | 3.2E-128  | 4.82E-99  | 2.316E-74 | 5.599E-63 | 2.721E-36 | 4.851E-21 | 3.475E-25 | 4.035E-13  | 0.0019579  | 0.0072691 | 0.5227151    | 1         | 0.5740826 | 0.0009981 | 0.0032079     | 2.573E-09    | 3.216E-18 | 2.396E-22 | 8.845E-44 | 2.935E-27     | 3.338E-34  | 6.965E-36 | 9.131E-54 | 8.943E-45     | 6.193E-57   | 1.98E-34     | 6.1E-78 | 7.3E-74    | 1E-134  |
| phogrin       | 1.19E-113   | 1.96E-121 | 1.851E-97 | 2.293E-73 | 3.832E-62 | 3.155E-38 | 3.24E-22  | 5.429E-26 | 5.966E-14  | 2.0014816  | 0.0014816 | 0.2984669    | 0.5740826 | 1         | 0.0119147 | 0.0022108     | 1.608E-07    | 1.368E-15 | 1.21E-17  | 6.394E-37 | 3.49E-21      | 1.192E-28  | 1.64E-28  | 4.899E-46 | 7.098E-39     | 8.435E-50   | 6.728E-29    | 2.4E-67 | 3E-62      | 1E-122  |
| OCRL          | 2.45E-141   | 1.42E-152 | 1.76E-122 | 1.264E-94 | 4.768E-85 | 6.182E-54 | 3.308E-33 | 1.201E-40 | 4.935E-23  | 1.93E-12   | 2.345E-09 | 0.0011467    | 0.0009981 | 0.0119147 | 1         | 0.8131336     | 0.0018294    | 7.722E-10 | 1.003E-12 | 4.526E-27 | 9.283E-18     | 1.548E-22  | 6.759E-24 | 1.235E-36 | 1.438E-30     | 5.238E-39   | 6.091E-24    | 6.6E-58 | 7.5E-58    | 1E-108  |
| synaptotagmin | 6.56E-104   | 2.75E-112 | 6.042E-89 | 1.935E-68 | 1.423E-61 | 1.074E-38 | 5.002E-24 | 1.679E-29 | 7.07E-17   | 1.679E-09  | 2.654E-07 | 0.0042143    | 0.0032079 | 0.0221808 | 0.8131336 | 1             | 0.018549     | 9.919E-07 | 1.244E-08 | 3.826E-18 | 4.239E-12     | 2.902E-15  | 3.239E-16 | 8.729E-25 | 1.099E-20     | 2.304E-26   | 2.768E-16    | 1.1E-39 | 7.9E-40    | 4.1E-76 |
| endophilinA2  | 2.56E-143   | 2.79E-160 | 8.93E-145 | 8.45E-114 | 1.04E-103 | 9.433E-82 | 9.347E-51 | 1.353E-57 | 2.287E-20  | 1.308E-07  | 2.673E-09 | 1.608E-07    | 0.0018294 | 0.0018549 | 1         | 0.0010479     | 0.0002953    | 2.114E-11 | 6.59E-07  | 2.34E-10  | 8.432E-10     | 2.662E-18  | 4.47E-16  | 6.546E-21 | 6.945E-12     | 1.4E-32     | 2E-32        | 7.2E-78 |            |         |
| syndapin      | 3.27E-149   | 6.01E-170 | 9.95E-160 | 7.08E-128 | 1.74E-120 | 4.75E-104 | 2.284E-66 | 1.889E-74 | 3.387E-49  | 4.727E-41  | 5.999E-35 | 1.15E-13     | 3.216E-18 | 1.368E-15 | 6.722E-10 | 9.919E-07     | 0.0010479    | 1         | 0.5238814 | 0.011554  | 0.0192962     | 0.0020554  | 0.0020278 | 2.608E-06 | 9.174E-06     | 2.217E-07   | 9.472E-05    | 1.2E-14 | 5E-17      | 7E-45   |
| clathrin      | 2.64E-145   | 2.15E-161 | 2.57E-131 | 7.1E-106  | 1.68E-105 | 9.099E-73 | 2.596E-49 | 1.133E-63 | 6.852E-40  | 1.957E-34  | 1.657E-30 | 1.361E-16    | 2.396E-22 | 1.21E-17  | 1.003E-12 | 1.244E-08     | 0.0002953    | 0.5238814 | 1         | 0.1157392 | 0.0268532     | 0.0150851  | 0.0038117 | 0.0001822 | 0.0006586     | 8.823E-05   | 0.0006651    | 7.6E-12 | 2.1E-17    | 4.4E-32 |
| SNAP25        | 2.43E-235   | 9.24E-266 | 1.56E-241 | 4.76E-198 | 2.82E-195 | 6.1E-161  | 8.11E-108 | 4.48E-128 | 1.842E-85  | 7.52E-78   | 6.9E-69   | 6.645E-32    | 8.845E-44 | 6.394E-37 | 4.526E-27 | 3.826E-18     | 2.114E-11    | 0.011554  | 0.1157392 | 1         | 0.2348234     | 0.1252468  | 0.0027951 | 0.0045273 | 0.0008283     | 0.0034449   | 4.4E-12      | 1.1E-18 | 1.3E-44    |         |
| synaptotagmin | 3.26E-130   | 7.68E-144 | 3.2E-111  | 1.664E-90 | 1.845E-93 | 1.683E-61 | 4.075E-43 | 3.45E-58  | 1.486E-36  | 3.753E-34  | 3.142E-31 | 1.12E-19     | 2.935E-27 | 3.49E-21  | 9.283E-18 | 4.239E-12     | 6.59E-07     | 0.0192962 | 0.0268532 | 0.2348234 | 1             | 0.9412889  | 0.6813292 | 0.4190763 | 0.4314436     | 0.3426687   | 0.2518399    | 0.00054 | 1.8E-08    | 7.3E-14 |
| dynamnin-1    | 1.17E-165   | 2.99E-188 | 1.5E-165  | 4.07E-135 | 1.43E-135 | 3.2E-106  | 1.354E-88 | 2.162E-58 | 5.176E-65  | 3.081E-49  | 1.263E-24 | 3.338E-34    | 1.192E-28 | 1.548E-22 | 2.902E-15 | 2.34E-10      | 0.0020554    | 0.0150851 | 0.1252468 | 0.9412889 | 1             | 0.7445335  | 0.389596  | 0.3815919 | 0.2814902     | 0.2208012   | 8.8E-05      | 5.1E-09 | 2.2E-20    |         |
| fcho2         | 2.14E-159   | 4.54E-178 | 3.95E-144 | 7.9E-118  | 2.02E-121 | 1.892E-85 | 5.457E-59 | 9.186E-78 | 1.015E-49  | 2.978E-47  | 3.591E-43 | 9.82E-26     | 6.965E-36 | 1.64E-28  | 6.759E-24 | 3.239E-16     | 8.432E-10    | 0.0020278 | 0.0038117 | 0.0013255 | 0.6813292     | 0.7445335  | 1         | 0.6602609 | 0.6300492     | 0.3536626   | 0.006        | 6.4E-09 | 4.6E-16    |         |
| Ph-PLCδ4      | 1.06E-231   | 8.61E-264 | 7.83E-242 | 1.18E-199 | 3.91E-200 | 6.73E-169 | 1.48E-114 | 2.31E-136 | 1.273E-92  | 1.927E-89  | 1.756E-80 | 1.306E-38    | 9.131E-54 | 4.899E-46 | 1.235E-36 | 8.729E-25     | 2.662E-18    | 2.608E-06 | 0.0001822 | 0.0027951 | 0.4190763     | 0.389596   | 0.6602609 | 1         | 0.8983522     | 0.8035112   | 0.4717706    | 0.00021 | 8.3E-10    | 8.8E-25 |
| mCherry alone | 3.68E-201   | 1.25E-230 | 2.63E-215 | 5.68E-177 | 5.73E-176 | 5.71E-153 | 1.25E-102 | 8.78E-120 | 8.125E-82  | 6.166E-79  | 1.195E-70 | 4.712E-32    | 8.943E-45 | 7.098E-39 | 1.438E-30 | 1.099E-20     | 4.47E-16     | 9.174E-06 | 0.0006586 | 0.0045273 | 0.4314436     | 0.3815919  | 0.6300492 | 0.8983522 | 1             | 0.9248599   | 0.5814943    | 0.00137 | 1E-07      | 1.3E-20 |
| amphiphysin   | 2.31E-248   | 9.06E-284 | 6.18E-269 | 1.88E-222 | 1.36E-220 | 1.11E-197 | 7.84E-133 | 1.41E-152 | 1.13E-105  | 2.896E-102 | 1.806E-91 | 6.193E-57    | 8.435E-50 | 5.238E-39 | 2.304E-26 | 6.546E-21     | 2.217E-07    | 8.823E-05 | 0.0008283 | 0.3426687 | 0.2814902     | 0.8035112  | 0.0045273 | 0.0008283 | 0.0034449     | 4.4E-12     | 1.1E-18      | 1.3E-44 |            |         |
| farn-mCherry  | 6.31E-148   | 1.19E-168 | 1.46E-146 | 6.47E-120 | 5.86E-122 | 1.893E-94 | 8.594E-65 | 1.204E-61 | 1.904E-53  | 4.1E-52    | 2.33E-47  | 1.665E-24    | 1.98E-34  | 6.728E-29 | 6.091E-24 | 2.768E-16     | 6.945E-12    | 9.472E-05 | 0.0006651 | 0.0034449 | 0.2518399     | 0.2208012  | 0.3536626 | 0.4717706 | 0.5814943     | 0.5815383   | 1            | 0.04849 | 5.5E-05    | 3.8E-11 |
| PH-PLC        | 1.11E-261   | 3.61E-299 | 2.02E-275 | 5         |           |           |           |           |            |            |           |              |           |           |           |               |              |           |           |           |               |            |           |           |               |             |              |         |            |         |

# SI Figure 4

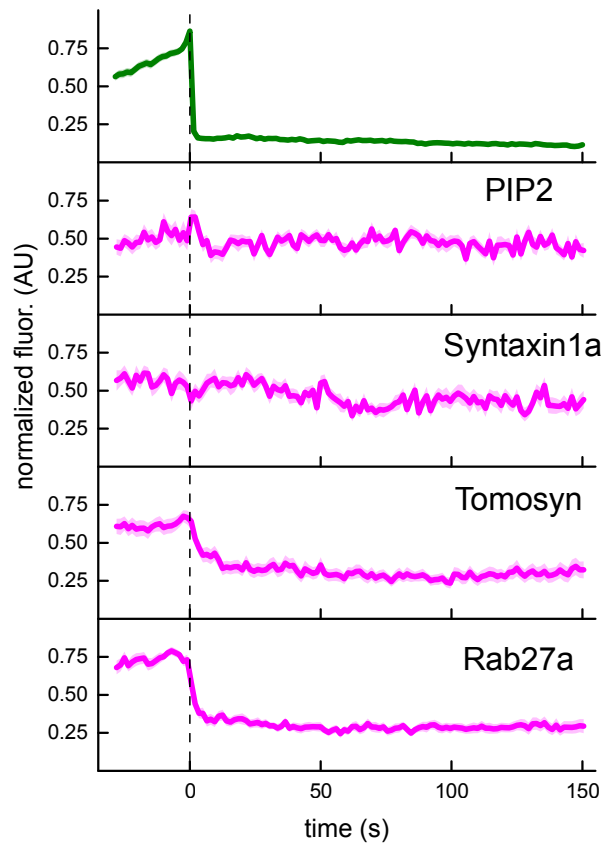

SI Figure 4: High potassium stimulation of exocytosis in INS-1 cells gives similar intensity trajectories as ionomycin stimulation. Cells were perfused as described for other stimulation experiments but with stimulation buffer instead of ionomycin. Background subtracted and normalized fluorescence intensity traces are shown for each protein indicated. The mean fluorescence intensity is shown as a dark line and the standard error of the dataset is shown in transparency behind the data. At top the average NPY-GFP signal for all events in this figure is shown as a relative standard of time (N=96). The dotted line marks time=0 for ease of trajectory comparison. The behaviors of each protein shown here are qualitatively very similar to the behaviors induced with ionomycin-stimulated exocytosis. PIP2 is transiently recruited near the time of membrane fusion. Rab27a and tomosyn are both stably present at the DCV before fusion and decay rapidly after exocytosis. Syntaxin1a appears to change very little upon exocytosis.

# SI Figure 5

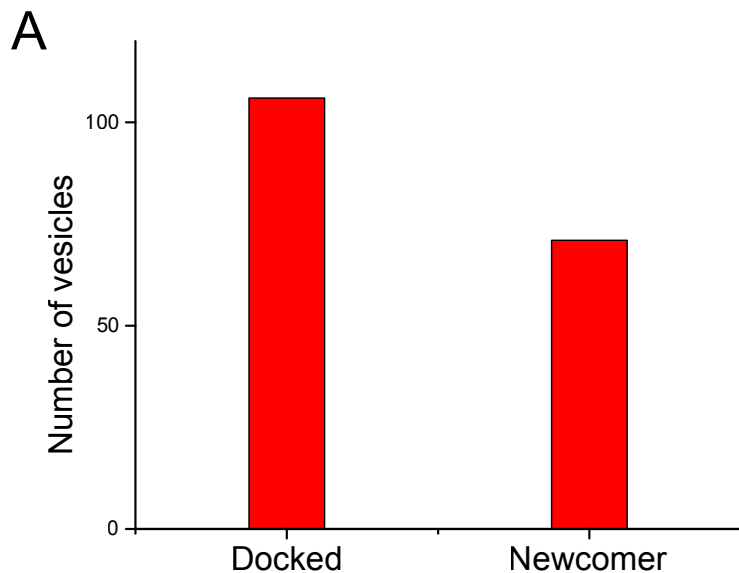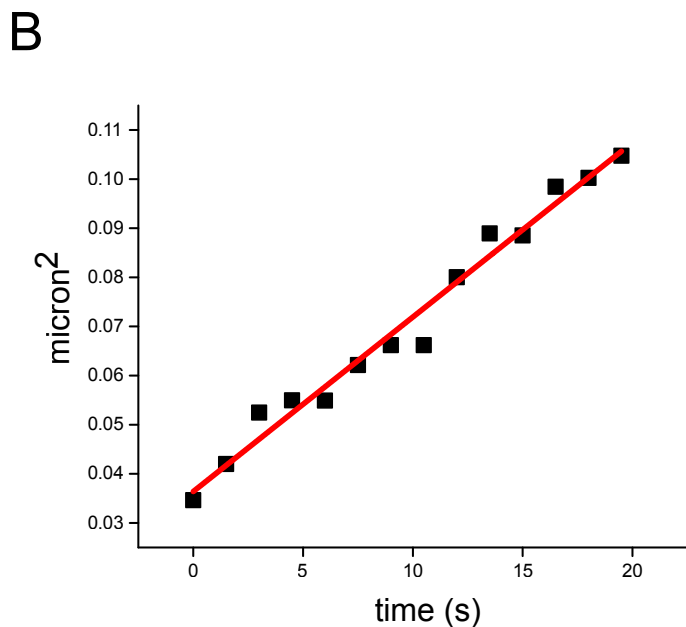

SI Figure 5: A majority of exocytic events occur from docked DCVs. (A) Number of vesicles in a subset of stimulated cells (13 cells, 177 events) that we classified as docked or newcomer. 60% of the vesicles are docked. We used particle tracking software (Mosaic, ImageJ) to track vesicles prior to stimulation. Vesicles were classified as docked if they were tracked for a full fifteen, continuous frames before exocytosis and otherwise classified as newcomers. This method almost certainly underestimates the number of docked vesicles; if a vesicle fell below the detection threshold used for only a single frame it was not counted as docked. (B) The average mean square displacement is plotted against time for all tracks from docked vesicles. This is fit with a straight line with a slope of  $36 \times 10^{-4} \mu\text{m}^2/\text{s}$ , which gives a diffusion coefficient of  $9 \times 10^{-4} \mu\text{m}^2/\text{s}$ , which is consistent with previous measurements of DCV diffusion parameters in neuroendocrine cells and indicates the vesicles are strongly docked at the plasma membrane (Lang et al. 2000. *Biophysical Journal* 78: 2863-2877).

## Rab27a

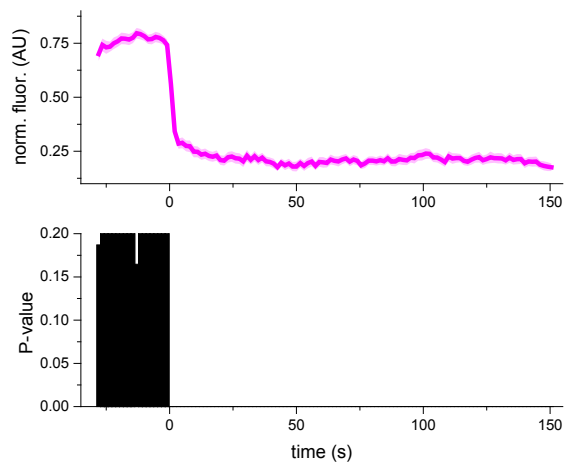

time (s)

-8.5

-1

6.5

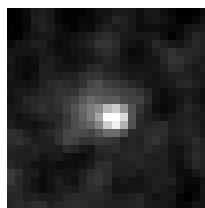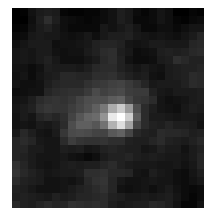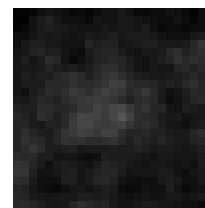

## Rab3a

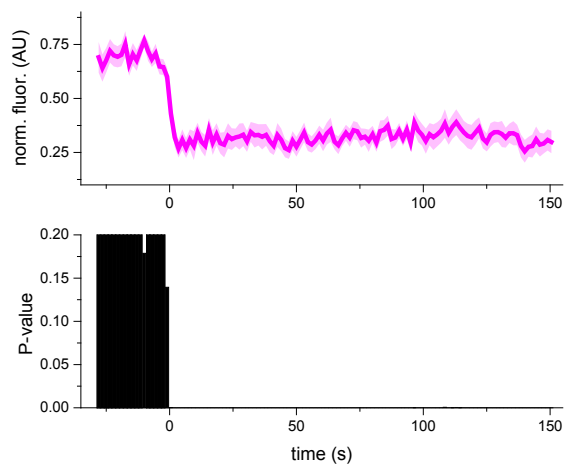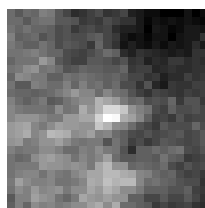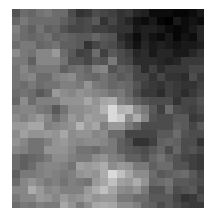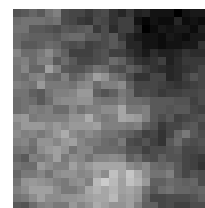

## Rabphilin3a

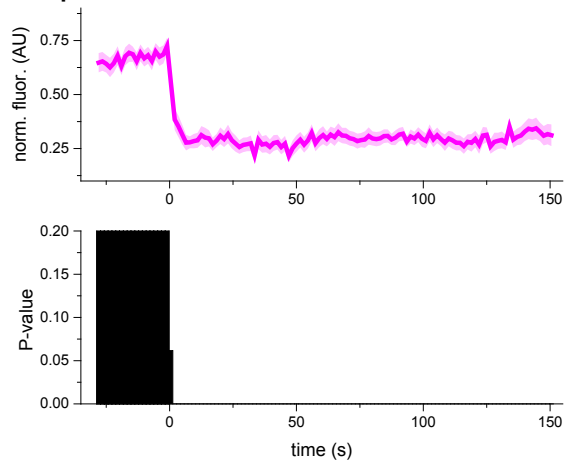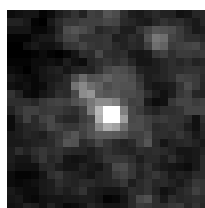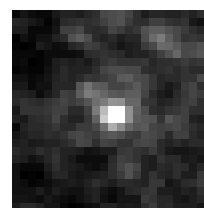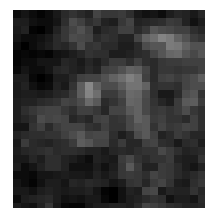

## mCherry

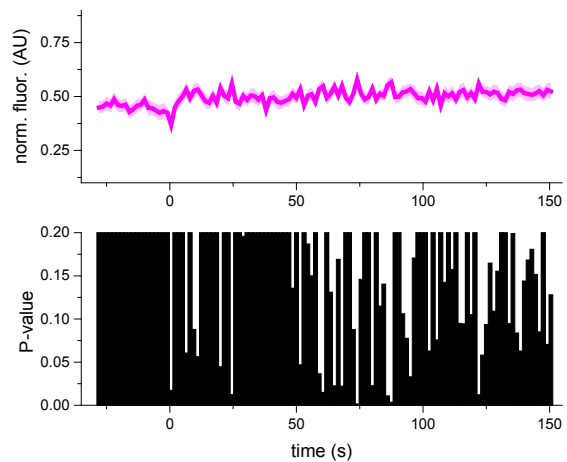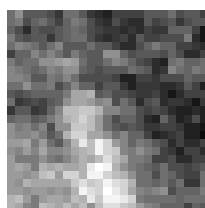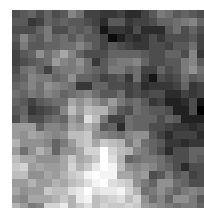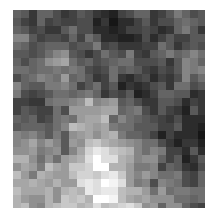

munc18a

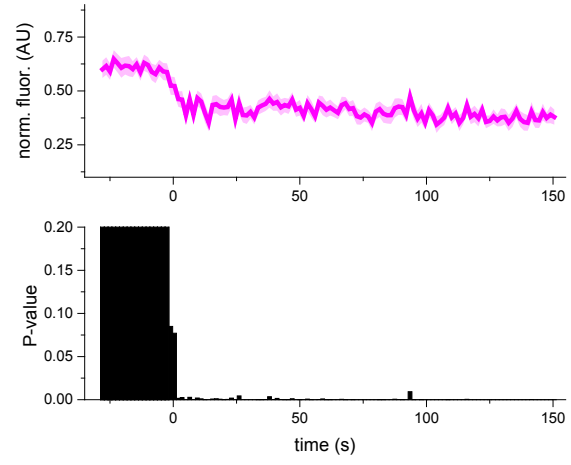

time (s)

-8.5

-1

6.5

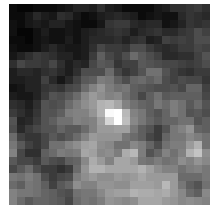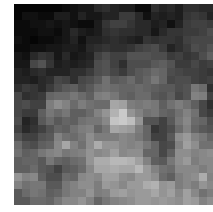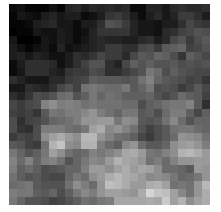

tomosyn

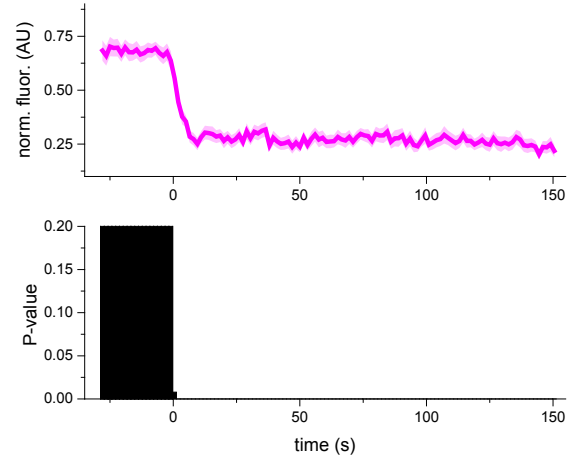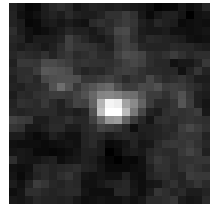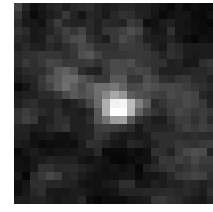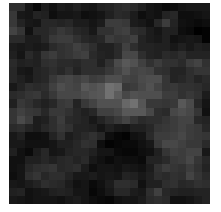

CAPS

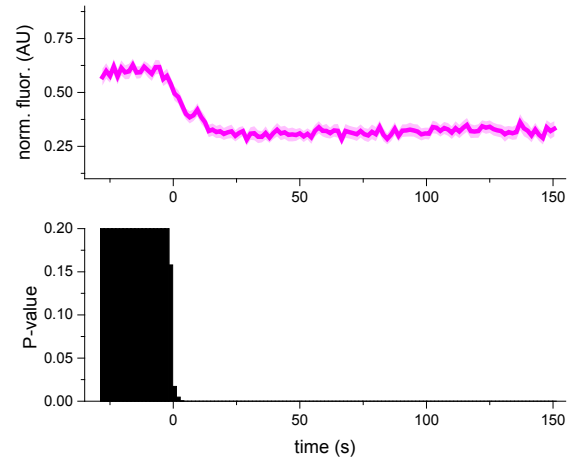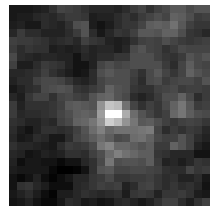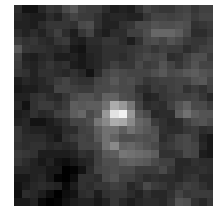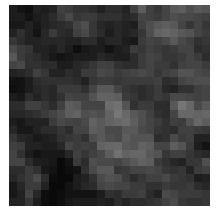



Dnm1

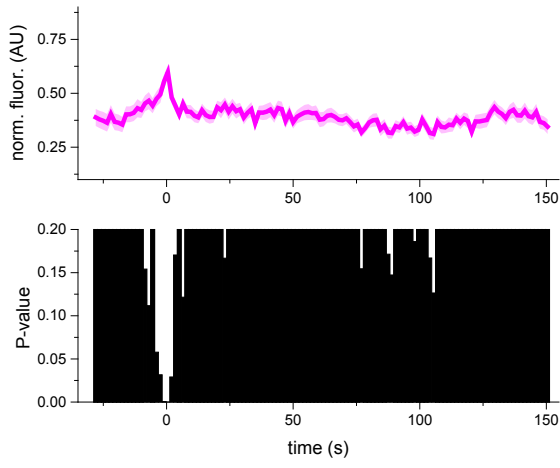

time (s)  
-8.5

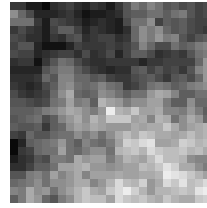

-1

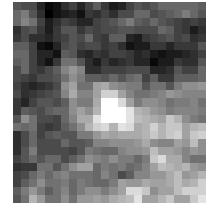

6.5

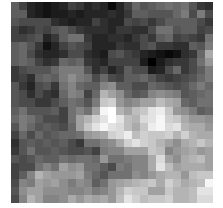

Dnm2

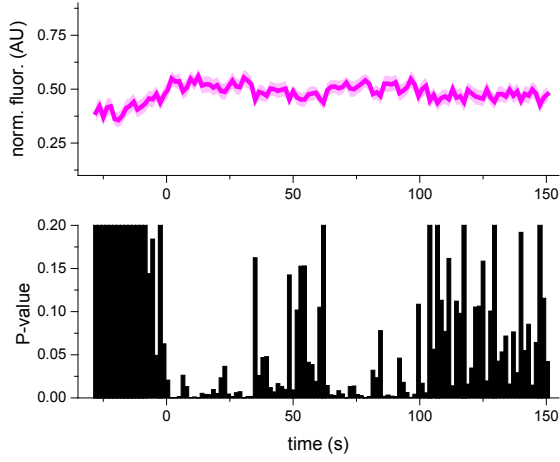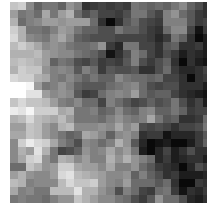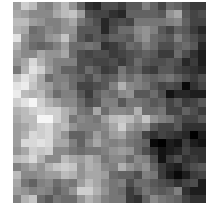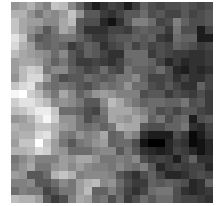

PIP2-sensor

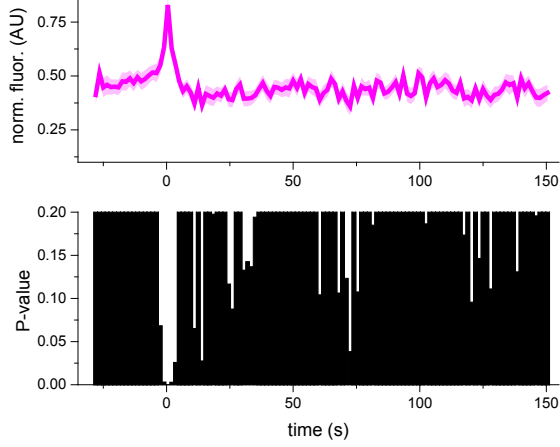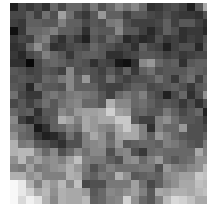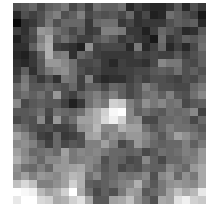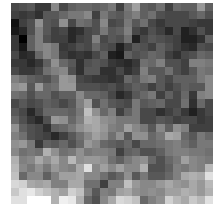

Amphiphysin

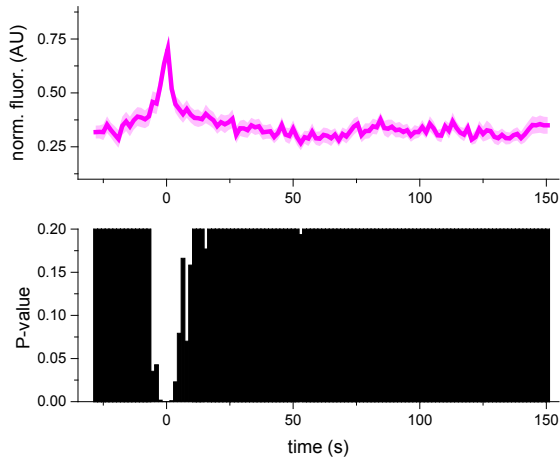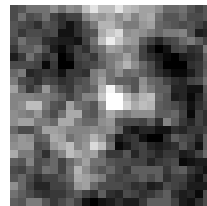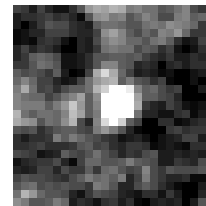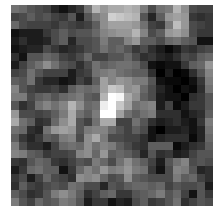

Syndapin

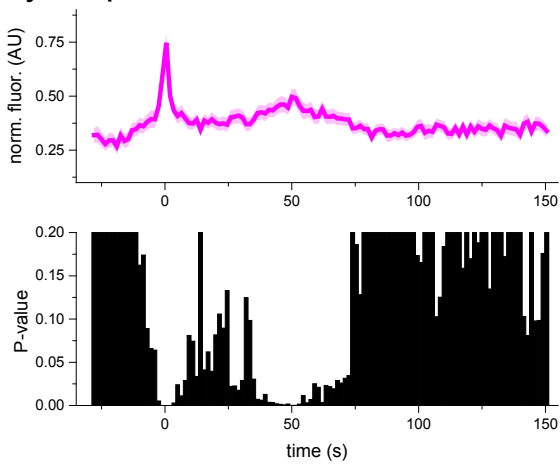

time (s)  
-8.5

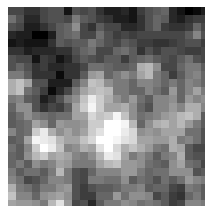

-1

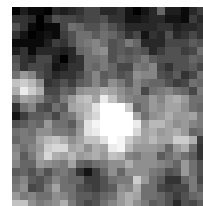

6.5

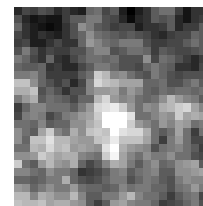

Endophilin A2

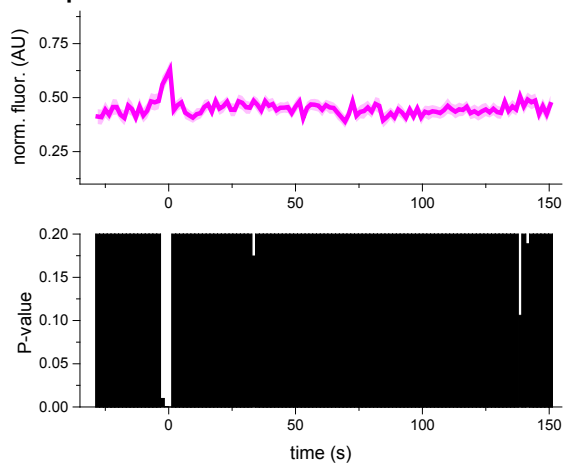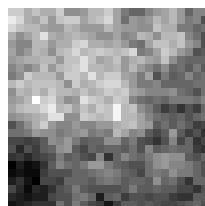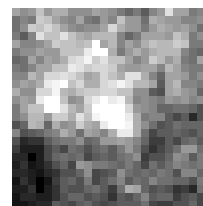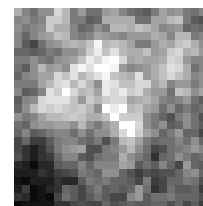

farn-mCherry

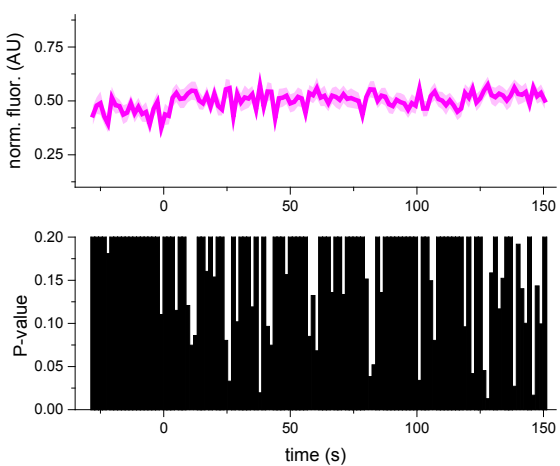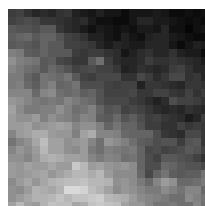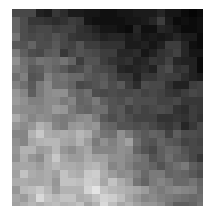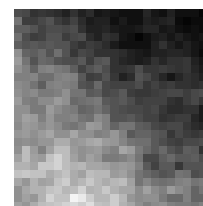

## Dnm1-K535A

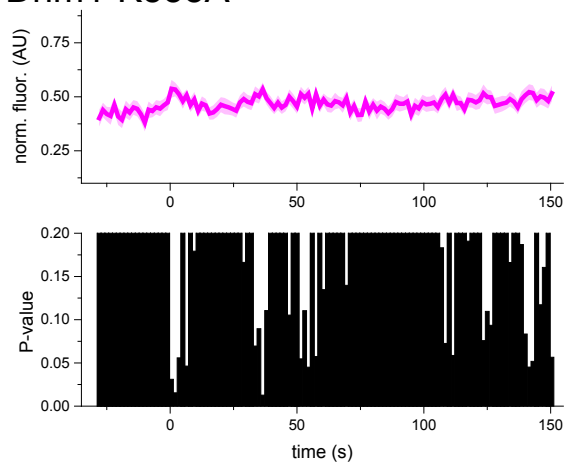time (s)  
-8.5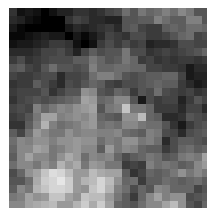

-1

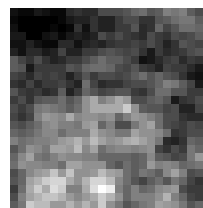

6.5

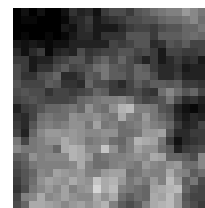

## Dnm1-S774E-S778E

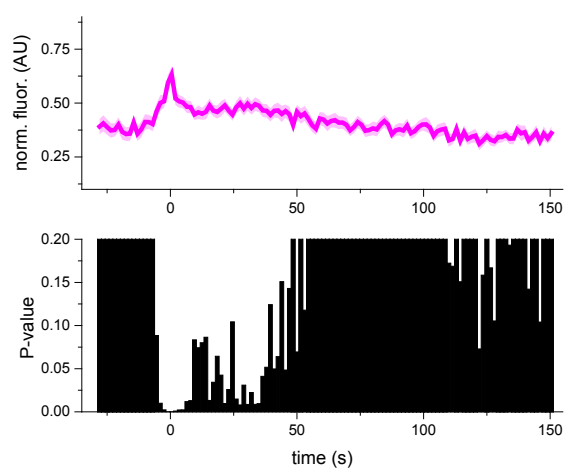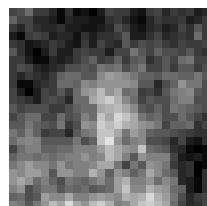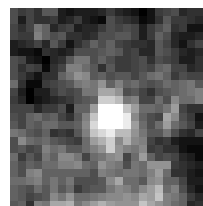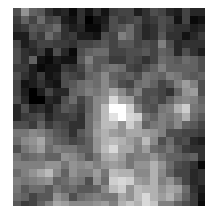

## Dnm1-833-838A

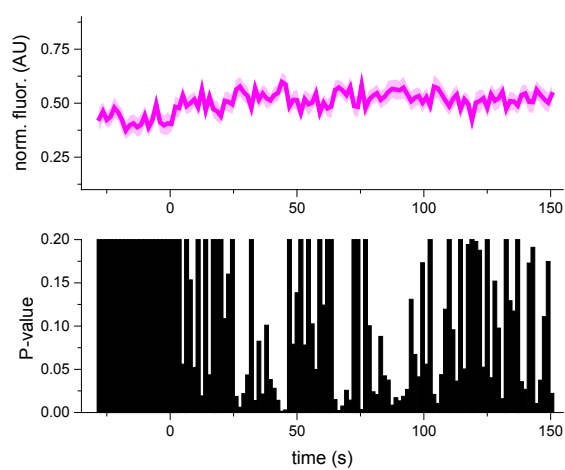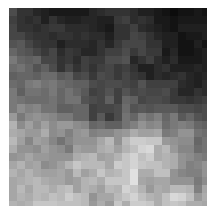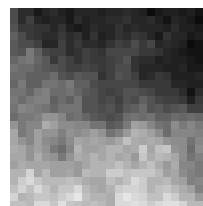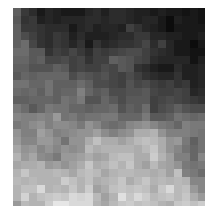

## Dnm1-K44A

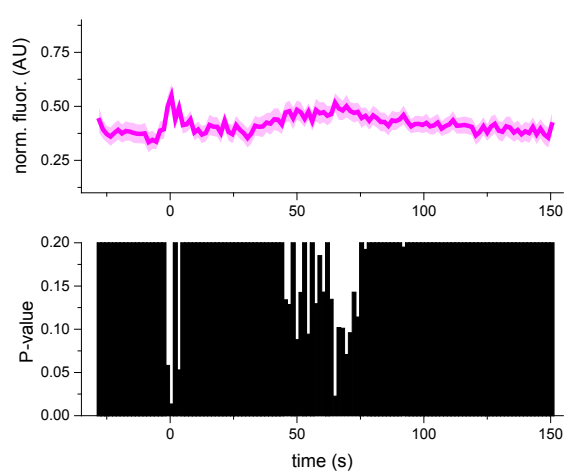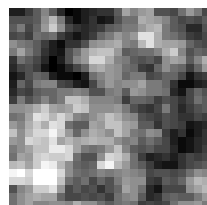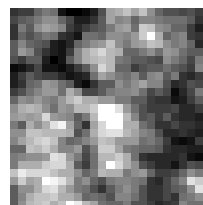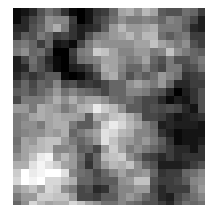

### Dnm2-K535A

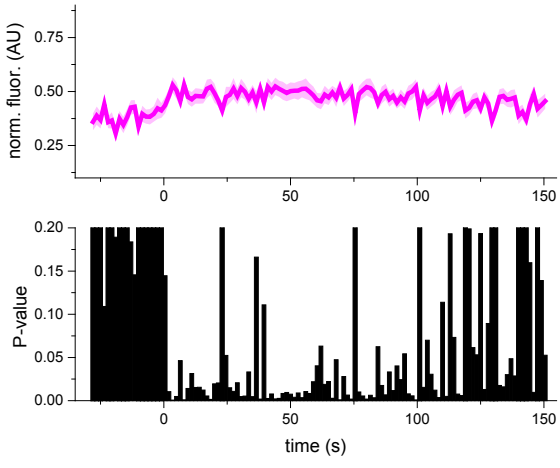

time (s)

-8.5

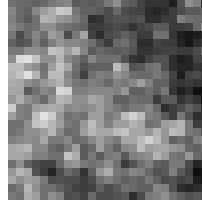

-1

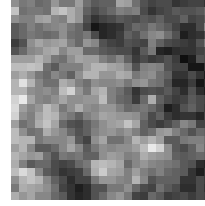

6.5

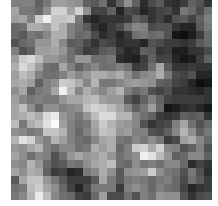

### Dnm2-dPRD

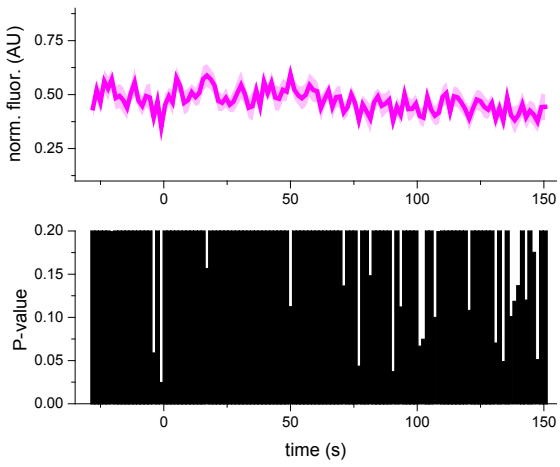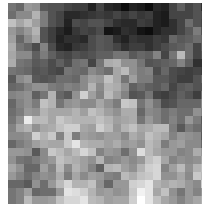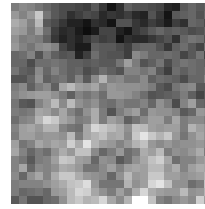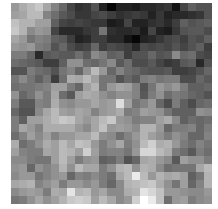

## syntaxin1a

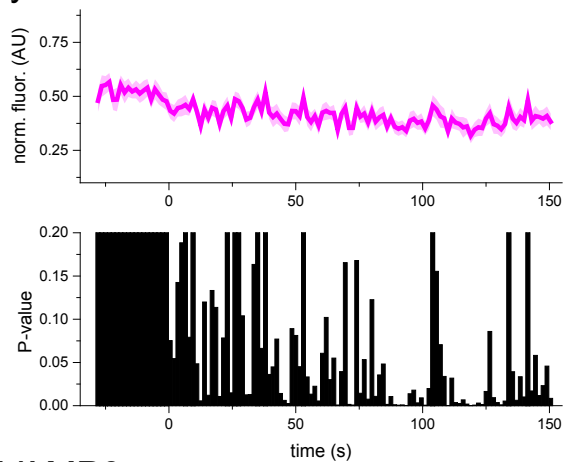

## complexin

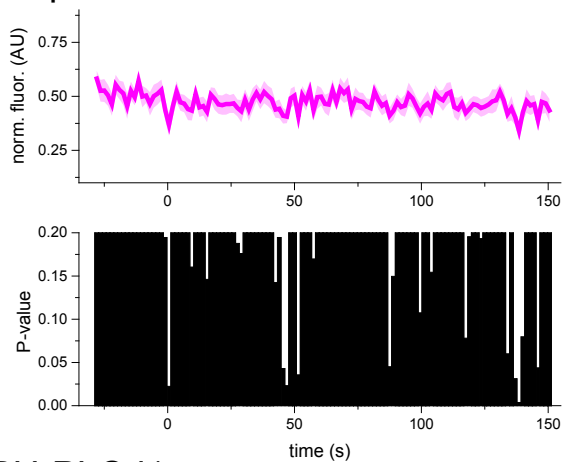

## VAMP3

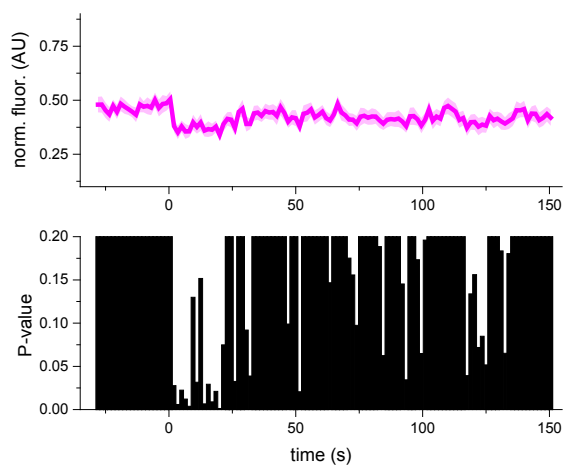

## PH-PLCd1

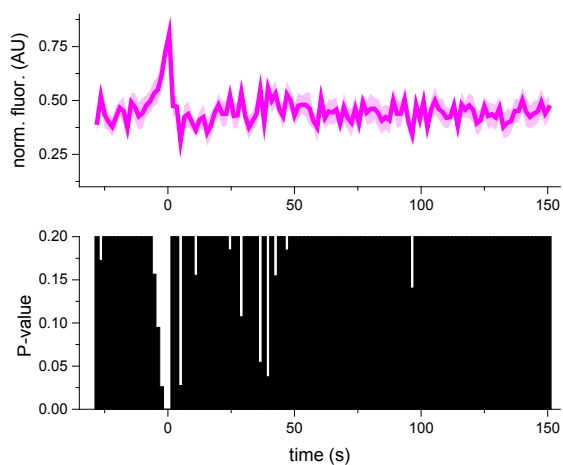

## SNAP25

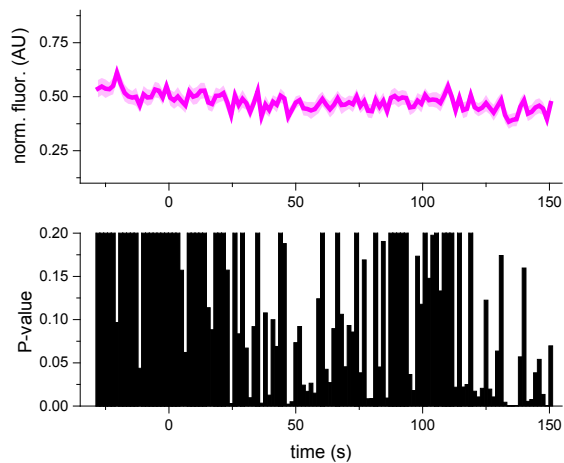

## clathrin

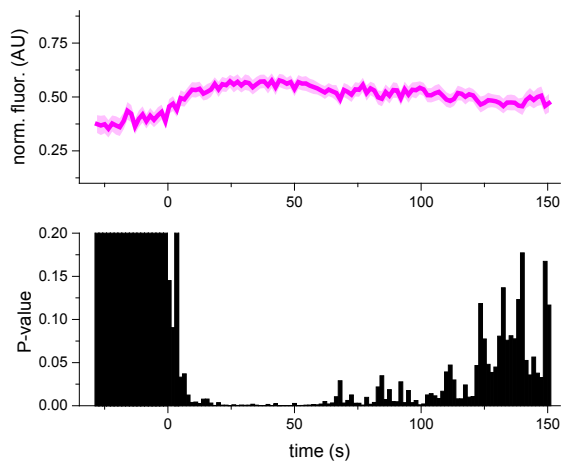

## synaptotagmin-1

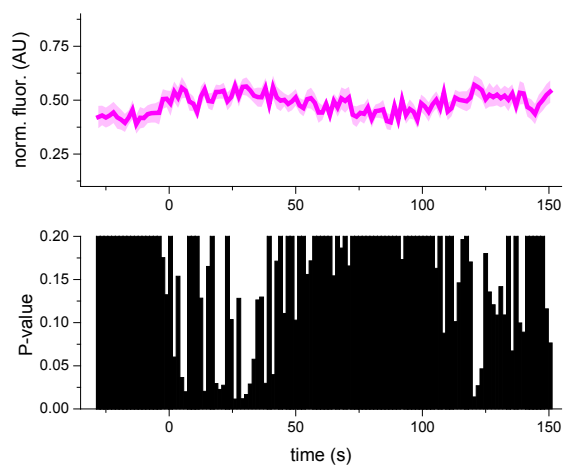

## phogrin

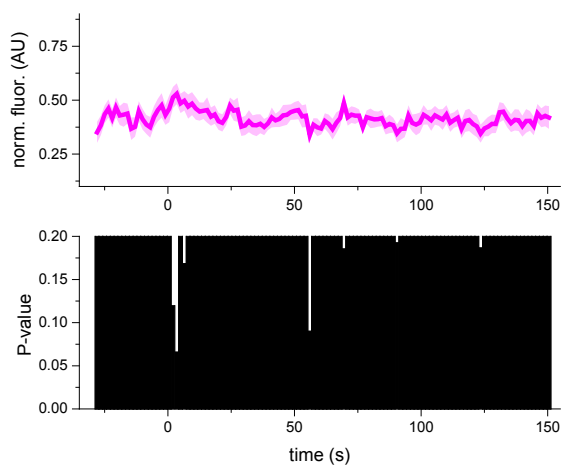



actin

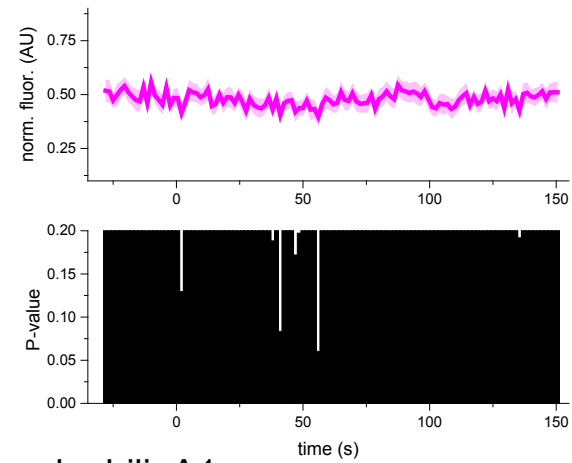

endophilinA1

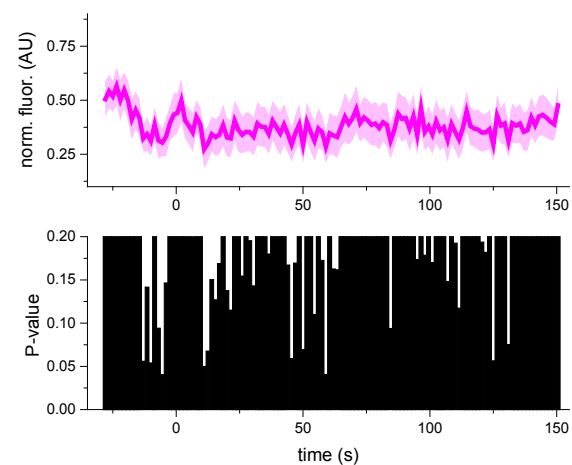

endophilinB2

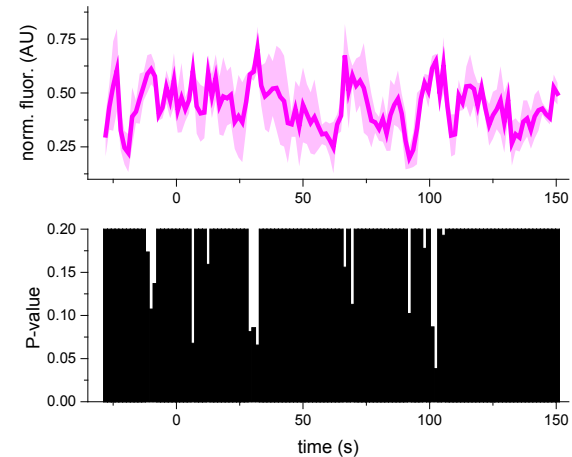

rab5a

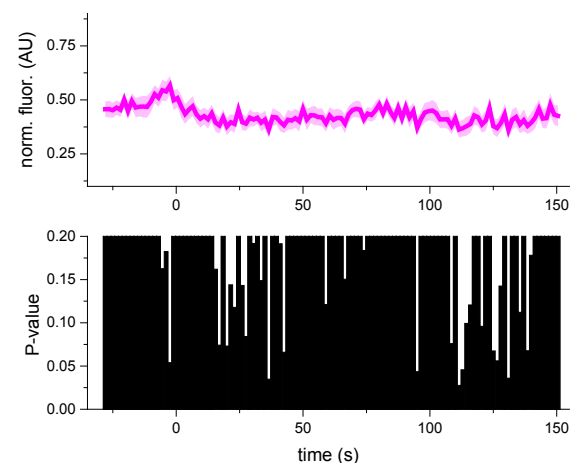

SI Figure 6: Full-length fluorescence intensity trajectories of all proteins of interest in exocytosis. Top left of each panel is the background subtracted and normalized fluorescence intensity traces for protein indicated, note the Y-axis scale is smaller than in the main text. Many of these are shown at shorter timescales in the main text to highlight the timescale where dynamic intensity changes occur (centered around the time of fusion). The mean fluorescence intensity is shown as a dark line and the standard error of the dataset is shown in transparency behind the data. If the standard error is not visible it is smaller than the line. Bottom left of each panel is a plot of T-test P-value versus time for the trajectory. A baseline average intensity was calculated for each trajectory by averaging the first ten data points in each individual trajectory that makes up the average intensity trajectory. Then, across the dataset the intensity at each timepoint was compared against the baseline intensity value using a Student's T-Test. The P-value is plotted against time. We interpret P-values of less than 0.05 to suggest that the intensity at the timepoint is statistically distinguishable from the average intensity at the beginning of the trajectory. At right of each panel for proteins from the main text are average image frames for before, near, and after the time of membrane fusion ( $t=0$ ). Interestingly, mCherry is mildly recruited after exocytosis, which is consistent with previous observations (Taraska et al. 2003. PNAS 100: 2070-2075). Presumably a docked DCV and the assembled exocytic machinery physically occlude mCherry (and other cytoplasmic molecules) and after exocytosis, some of the space can be occupied by cytoplasmic mCherry. Importantly, clathrin light chain appears to be recruited to a greater extent than mCherry, which suggests that clathrin is specifically associating with the exocytic site instead of merely assembling at space recently vacated by the DCV.

# SI Figure 7

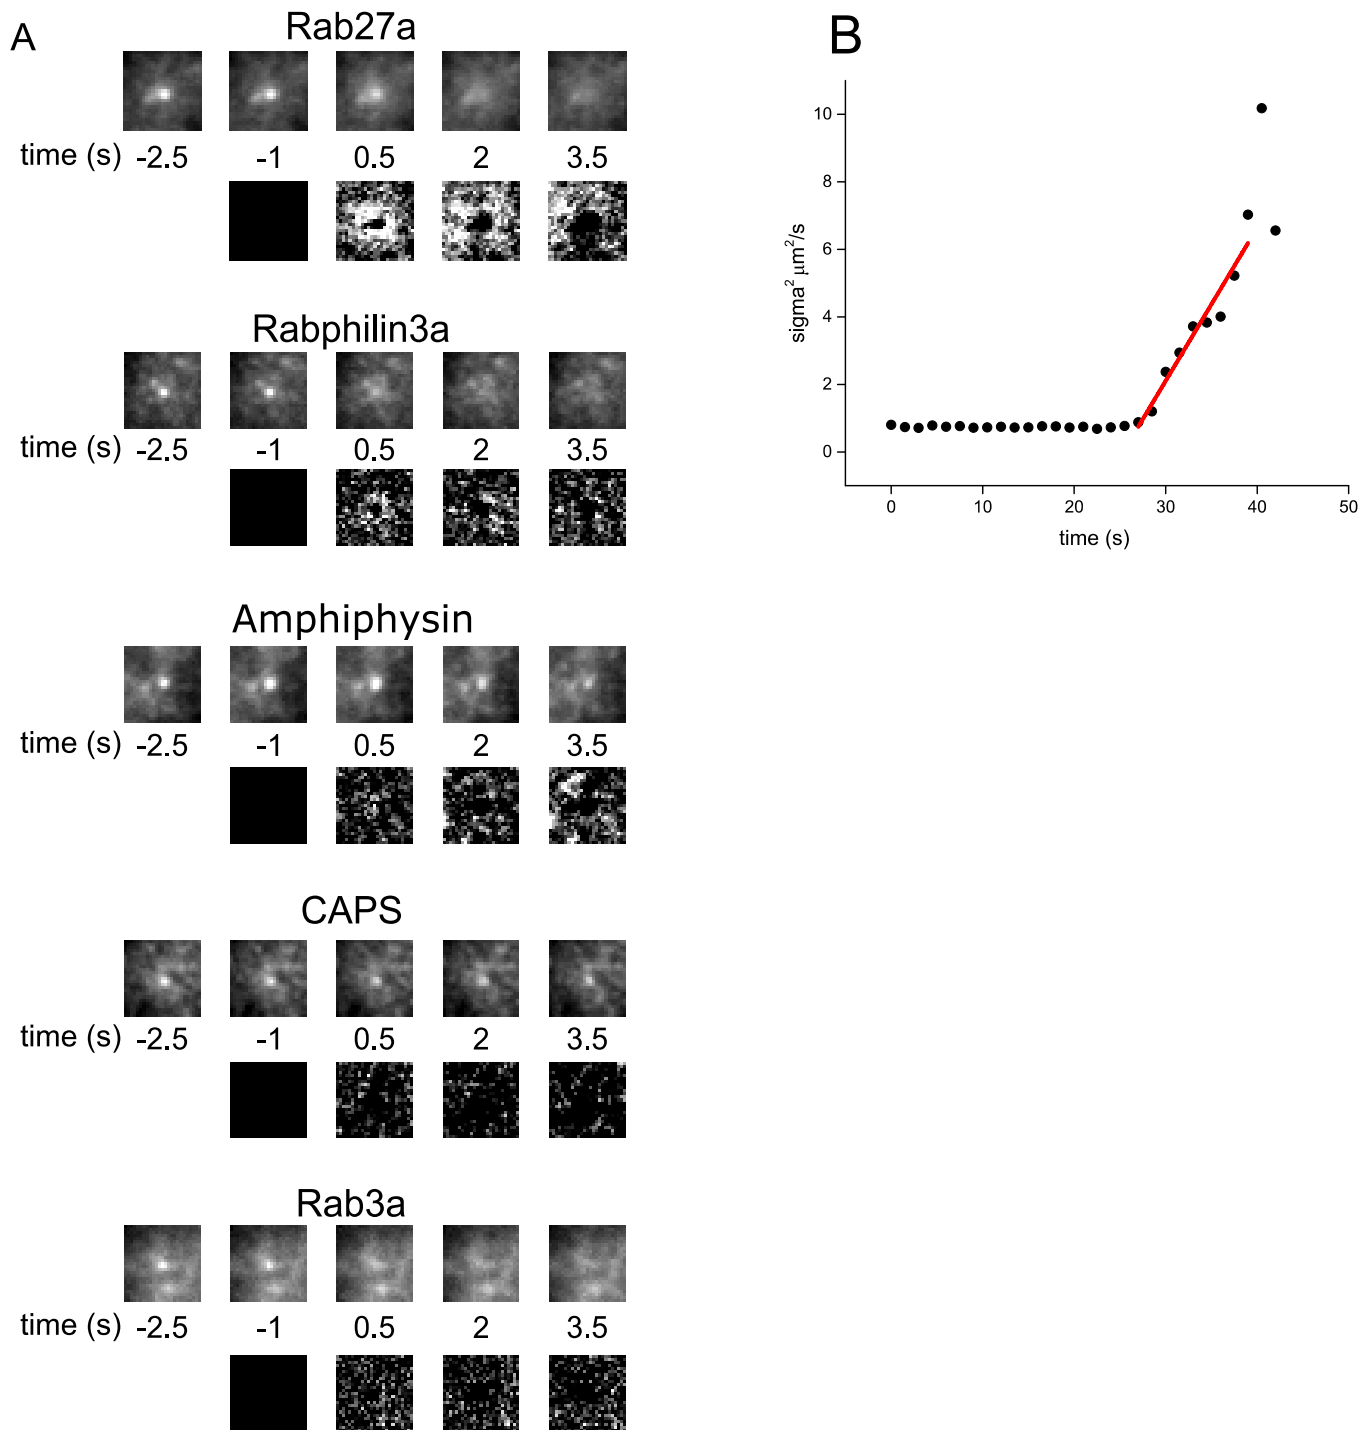

SI Figure 7: Rab27a, but not other proteins, diffuses away from the exocytic site in the plane of the membrane. (A) Top of each panel, consecutive frames of an average movie of exocytosis from the indicated construct are shown (*n* values for the average are listed in Figure SI 1B). No background subtraction or normalization was applied to movie shown before averaging, though similar results were obtained with normalization. Time values are the same as shown in fluorescence intensity trajectories in Figures 3-5. Bottom of each panel, average movie frames with the frame prior to fusion subtracted. This was done to better visualize spreading of fluorescence in a lateral wave from the exocytic site (as in Rab27a). Many of the proteins analyzed show little to no evidence of the lateral wave evident in the Rab27a panel. (B) Plot of width of a Gaussian fit to the Rab27a signal against time. The diffusion of particles from a point source within a plane is well described. When this is imaged the particle distribution is convolved with the PSF of the microscope, which can be fit with a Gaussian distribution. The width parameter of the Gaussian profile can be fit to obtain an estimate of the diffusion coefficient of the particles. A Gaussian fit to the Rab27a profile (radially averaged line scan) is stable until exocytosis after which the protein begins diffusing outwards, increasing the width of the Gaussian fit. Points on the plot of Gaussian width parameter over time corresponding to the frames after fusion are fit with a straight line, the slope of which gives the diffusion coefficient (Zenisek et al. 2002. *Neuron* 35: 1085-1097). Similar treatment of the other proteins shown resulted in plots that could not be fit with a straight line, further suggesting that these proteins do not diffuse away from the exocytic site in the plane of the membrane.

# SI Figure 8

**A**

|                  | offset (y0) | A1      | t1      | Reduced Chi-Sqr | Adj. R-Square |
|------------------|-------------|---------|---------|-----------------|---------------|
| WT               | 0.25106     | 0.5574  | 44.2026 | 7.22E-04        | 0.96519       |
| Dnm1-K535A       | 0.1392      | 0.69836 | 23.629  | 7.51E-04        | 0.97094       |
| Dnm1-833-838A    | 0.21041     | 0.65869 | 28.6448 | 2.85E-04        | 0.98857       |
| Dnm1-K44a        | 0.19653     | 0.6283  | 37.8006 | 9.00E-04        | 0.96499       |
| Dnm1-S774E-S778E | 0.20447     | 0.60556 | 32.7986 | 2.56E-04        | 0.9886        |
| Dnm2-K535A       | 0.25576     | 0.60036 | 40.0313 | 2.87E-04        | 0.98762       |
| Dnm2-dPRD        | 0.15717     | 0.74426 | 30.9498 | 2.39E-04        | 0.99272       |
| Dnm2-siRNA treat | 0.21105     | 0.66108 | 21.1652 | 2.40E-04        | 0.99087       |

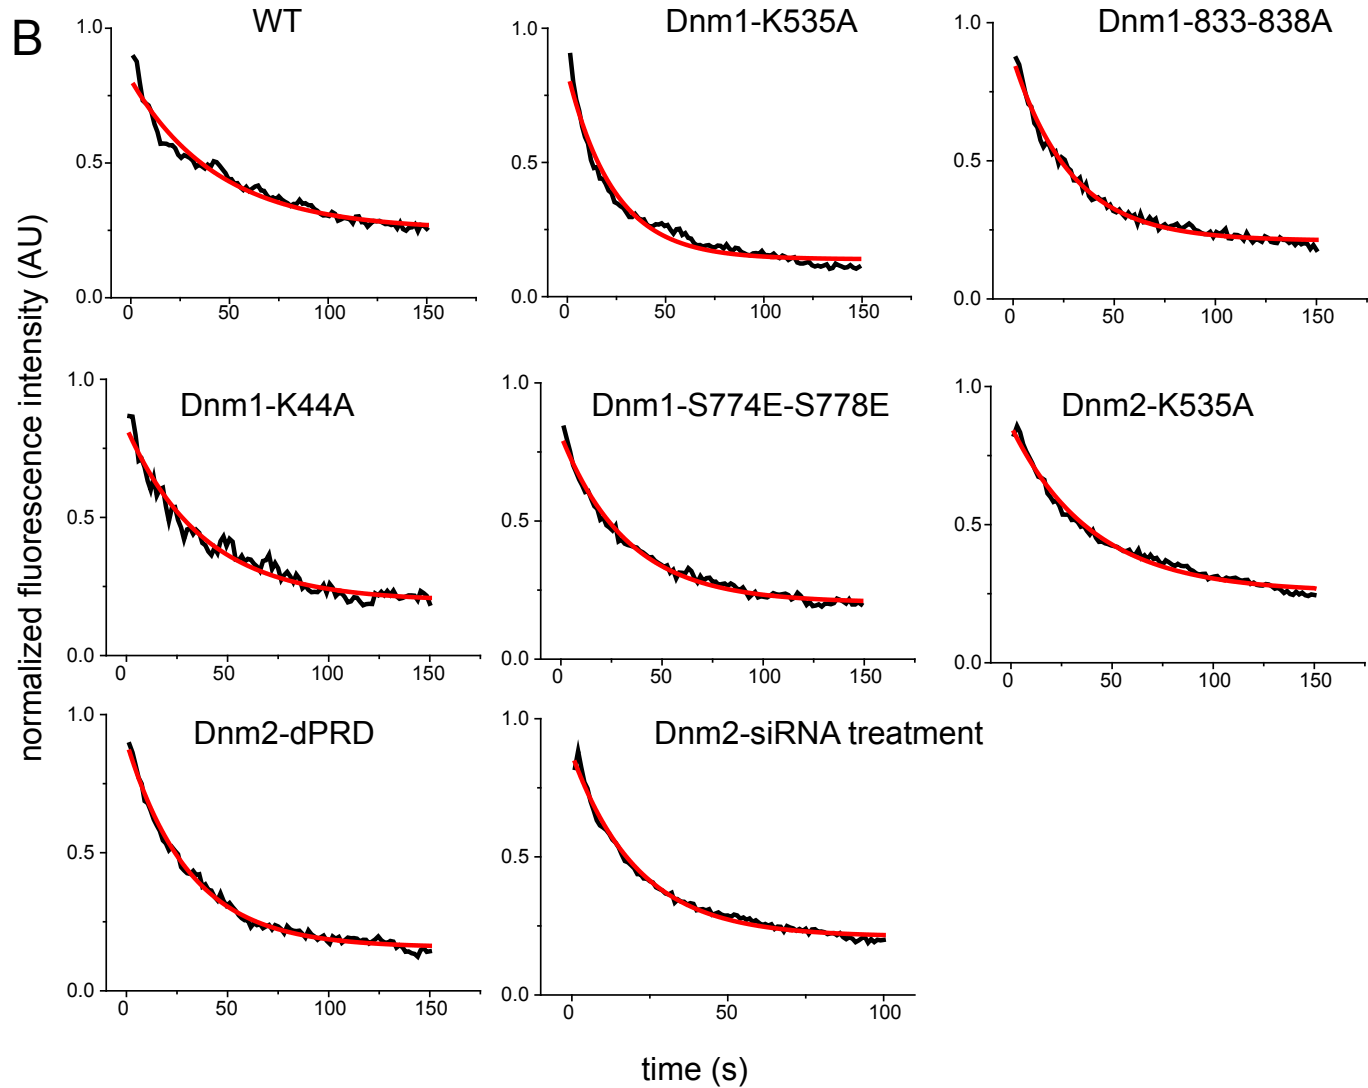

SI Figure 8: Fitting of tPA-GFP decays post-fusion in INS-1 cells. A) Table of fitting parameters and statistical measures of goodness-of-fit, fitting was performed in Origin software using the equation:  $y=A*\exp(-x/t1) + y0$ . B) tPA-GFP decays (black lines), beginning at  $t=1.5$  seconds, are fit with single component exponential decays (red lines).
